# Supplementary material for: Development and validation of a multi-locus DNA metabarcoding method to identify endangered species in complex samples
Source: PubMed Central journal article supplement (PMC5632295; doi:10.1093/gigascience/gix080), 2017-08-19
Supplement: gix080_GIGA-D-17-00107_Original-Submission.pdf [file gix080_GIGA-D-17-00107_Original-Submission.pdf]

# Development and validation of a multi-locus DNA metabarcoding method to identify endangered species in complex samples

Alfred J. Arulandhu <sup>1,2‡</sup>, Martijn Staats <sup>1‡</sup>, Rico Hagelaar <sup>1</sup>, Marleen M. Voorhuijzen <sup>1</sup>, Theo W. Prins <sup>1</sup>, Ingrid Scholtens <sup>1</sup>, Adalberto Costessi <sup>3</sup>, Danny Duijsings <sup>3</sup>, François Rechenmann <sup>4</sup>, Frédéric B. Gaspar <sup>5</sup>, Maria Teresa Barreto Crespo <sup>5</sup>, Arne Holst-Jensen <sup>6</sup>, Matthew Birck <sup>7</sup>, Malcolm Burns <sup>8</sup>, Hez Hird <sup>9</sup>, Rupert Hohegger <sup>10</sup>, Alexander Klingl <sup>11</sup>, Lisa Lundberg <sup>12</sup>, Chiara Natale <sup>13</sup>, Hauke Niekamp <sup>14</sup>, Elena Perri <sup>15</sup>, Alessandra Barbante <sup>15</sup>, Jean-Philippe Rosec <sup>16</sup>, Ralf Seyfarth <sup>17</sup>, Tereza Sovová <sup>18</sup>, Christoff Van Moorlegghem <sup>19</sup>, Saskia van Ruth <sup>1,2</sup>, Tamara Peelen <sup>20</sup> and Esther Kok <sup>1\*</sup>

11 Alfred J. Arulandhu <sup>1</sup> - RIKILT Wageningen University & Research, P.O. Box 230, 6700 AE Wageningen, The  
12 Netherlands – [alfred.arulandhu@wur.nl](mailto:alfred.arulandhu@wur.nl)

13 Alfred J. Arulandhu <sup>2</sup> – Food Quality and Design Group, Wageningen University and Research, P.O. Box 8129,  
14 6700 EV Wageningen, The Netherlands – [alfred.arulandhu@wur.nl](mailto:alfred.arulandhu@wur.nl)

15 Martijn Staats <sup>1</sup> - RIKILT Wageningen University & Research, P.O. Box 230, 6700 AE Wageningen, The  
16 Netherlands – [martijn.staats@wur.nl](mailto:martijn.staats@wur.nl)

17 Rico Hagelaar <sup>1</sup> - RIKILT Wageningen University & Research, P.O. Box 230, 6700 AE Wageningen, The  
18 Netherlands – [rico.hagelaar@wur.nl](mailto:rico.hagelaar@wur.nl)

19 Marleen M. Voorhuijzen <sup>1</sup> - RIKILT Wageningen University & Research, P.O. Box 230, 6700 AE Wageningen,  
20 The Netherlands - [marleen.voorhuijzen@wur.nl](mailto:marleen.voorhuijzen@wur.nl)

21 Theo W. Prins <sup>1</sup> - RIKILT Wageningen University & Research, P.O. Box 230, 6700 AE Wageningen, The  
22 Netherlands - [theo.prins@wur.nl](mailto:theo.prins@wur.nl)

23 Ingrid M.J. Scholtens <sup>1</sup> - RIKILT Wageningen University & Research, P.O. Box 230, 6700 AE Wageningen, The  
24 Netherlands - [ingrid.scholtens@wur.nl](mailto:ingrid.scholtens@wur.nl)

25 Adalberto Costessi <sup>3</sup> - Baseclear B. V, Einsteinweg 5, 2333 CC Leiden, The Netherlands -  
26 [Adalberto.Costessi@baseclear.nl](mailto:Adalberto.Costessi@baseclear.nl)

27 Danny Duijsings <sup>3</sup> - Baseclear B. V, Einsteinweg 5, 2333 CC Leiden, The Netherlands -  
28 [Danny.Duijsings@baseclear.nl](mailto:Danny.Duijsings@baseclear.nl)

29 François Rechenmann <sup>4</sup> - GenoStar Bioinformatics Solutions, 60 rue Lavoisier, 38330 Montbonnot Saint Martin,  
30 France - [rechenmann@genostar.com](mailto:rechenmann@genostar.com)

31 Frédéric B. Gaspar <sup>5</sup> – iBET, Instituto de Biologia Experimental e Tecnológica, Apartado 12, 2780-901 Oeiras,  
32 Portugal - [fgaspar@ibet.pt](mailto:fgaspar@ibet.pt)

33 Maria Teresa Barreto Crespo <sup>5</sup> - iBET, Instituto de Biologia Experimental e Tecnológica, Apartado 12, 2780-901  
34 Oeiras, Portugal - [tcrespo@ibet.pt](mailto:tcrespo@ibet.pt)

35 Arne Holst-Jensen <sup>6</sup> - Norwegian Veterinary Institute, Ullevaalsveien 68, P.O.Box 750 Sentrum, 0106 Oslo,  
36 Norway - [arne.holst-jensen@vetinst.no](mailto:arne.holst-jensen@vetinst.no)

37 Matthew Birck <sup>7</sup> - U.S. Customs and Border Protection Laboratory, 1100 Raymond Blvd Newark, NJ 07102 USA  
38 - [MATTHEW.BIRCK@cbp.dhs.gov](mailto:MATTHEW.BIRCK@cbp.dhs.gov)

39 Malcolm Burns <sup>8</sup> - LGC, Queens Road, Teddington, Middlesex, TW11 0LY, United kingdom -  
40 [Malcolm.Burns@lgcgroup.com](mailto:Malcolm.Burns@lgcgroup.com)

41 Hez Hird <sup>9</sup> – Fera, Sand Hutton, York, YO41 1LZ, United Kingdom - [Hez.Hird@fera.co.uk](mailto:Hez.Hird@fera.co.uk)

42 Rupert Hochegger <sup>10</sup> - Austrian Agency for Health and Food Safety, Spargelfeldstrasse 191, 1220 Vienna,  
43 Austria - [rupert.hochegger@ages.at](mailto:rupert.hochegger@ages.at)

44 Alexander Klingl <sup>11</sup> – Generalzolldirektion, Direktion IX, Bildungs- und Wissenschaftszentrum der  
45 Bundesfinanzverwaltung, Dienstort Hamburg, Baumacker 3, D-22523 Hamburg, Germany -  
46 [Alexander.Klingl@bwz.bund.de](mailto:Alexander.Klingl@bwz.bund.de)  
47 Lisa Lundberg <sup>12</sup> - Livsmedelsverket, Att. Lisa Lundberg, Strandbodgatan 4, SE 75323 Uppsala, Sweden -  
48 [lisa.lundberg@slv.se](mailto:lisa.lundberg@slv.se)  
49 Chiara Natale <sup>13</sup> - AGENZIA DELLE DOGANE E DEI MONOPOLI, Laboratori e servizi chimici – Laboratorio  
50 Chimico di Genova, 16126 Genova, Via Rubattino n.6, Italy - [chiara.natale@agenziadogane.it](mailto:chiara.natale@agenziadogane.it)  
51 Hauke Niekamp <sup>14</sup> - Eurofins GeneScan GmbH, Engesserstrasse 4 79108 Freiburg, Germany -  
52 [HaukeNiekamp@eurofins.de](mailto:HaukeNiekamp@eurofins.de)  
53 Elena Perri <sup>15</sup> - CREA-SCS sede di Tavazzano - Laboratorio via Emilia, Km 307, 26838 Tavazzano, Italy -  
54 [elena.perri@crea.gov.it](mailto:elena.perri@crea.gov.it)  
55 Alessandra Barbante <sup>15</sup> - CREA-SCS sede di Tavazzano - Laboratorio via Emilia, Km 307, 26838 Tavazzano,  
56 Italy - [alessandra.barbante@crea.gov.it](mailto:alessandra.barbante@crea.gov.it)  
57 Jean-Philippe Rosec <sup>16</sup> - Service Commun des Laboratoires, Laboratoire de Montpellier, Parc Euromédecine,  
58 205 rue de la Croix Verte, 34196 Montpellier Cedex 5, France - [Jean-Philippe.ROSEC@scl.finances.gouv.fr](mailto:Jean-Philippe.ROSEC@scl.finances.gouv.fr)  
59 Ralf Seyfarth <sup>17</sup> - Biolytix AG, Benkenstrasse 254, 4108 Witterswil, Switzerland - [Ralf.seyfarth@biolytix.ch](mailto:Ralf.seyfarth@biolytix.ch)  
60 Tereza Sovová <sup>18</sup> – Crop Research Institute, Department of Molecular Genetics, Drnovská 507, 161 06 Prague,  
61 Czech Republic - [mail@terezasovova.cz](mailto:mail@terezasovova.cz)  
62 Christoff Van Moorleghem <sup>19</sup> - Laboratory of Customs & Excises, Blijde Inkomststraat 20, B-3000 Leuven,  
63 Belgium - [christoff.vanmoorleghem@minfin.fed.be](mailto:christoff.vanmoorleghem@minfin.fed.be)  
64 Saskia van Ruth <sup>1</sup> - RIKILT Wageningen University & Research, P.O. Box 230, 6700 AE Wageningen, The  
65 Netherlands - [saskia.vanruth@wur.nl](mailto:saskia.vanruth@wur.nl)  
66 Saskia van Ruth <sup>2</sup> - Food Quality and Design Group, Wageningen University and Research, P.O. Box 8129, 6700  
67 EV Wageningen, The Netherlands - [saskia.vanruth@wur.nl](mailto:saskia.vanruth@wur.nl)  
68 Tamara Peelen <sup>20</sup> - Dutch Customs Laboratory, Kingsfordweg 1, 1043 GN, Amsterdam, The Netherlands -  
69 [t.peelen@belastingdienst.nl](mailto:t.peelen@belastingdienst.nl)  
70 Esther Kok <sup>1\*</sup> - RIKILT Wageningen University & Research, P.O. Box 230, 6700 AE Wageningen, The  
71 Netherlands - [esther.kok@wur.nl](mailto:esther.kok@wur.nl)

‡ Alfred J. Arulandhu and Martijn Staats contributed equally to this work.

Corresponding author: Esther Kok  
e-mail: [esther.kok@wur.nl](mailto:esther.kok@wur.nl)

85

86

87

88 **Abstract (max. 250 words)**

89

90 **Background:** DNA metabarcoding provides great potential for species identification in complex samples such  
91 as food supplements and traditional medicines. Such a method would aid CITES (the Convention on  
92 International Trade in Endangered Species of Wild Fauna and Flora) enforcement officers to combat wildlife  
93 crime by preventing illegal trade of endangered plant and animal species. The objective of this research was to  
94 develop a multi-locus DNA metabarcoding method for forensic wildlife species identification and to evaluate the  
95 applicability and reproducibility of this approach across different laboratories.

96

97 **Results:** A DNA metabarcoding method was developed that makes use of 12 DNA barcode markers that have  
98 demonstrated universal applicability across a wide range of plant and animal taxa, and that facilitate the  
99 identification of species in samples containing degraded DNA. The DNA metabarcoding method was developed  
100 based on Illumina MiSeq amplicon sequencing of well-defined experimental mixtures, for which a  
101 bioinformatics pipeline with user-friendly web interface was developed. The performance of the DNA  
102 metabarcoding method was assessed in an international validation trial by 16 laboratories, in which the method  
103 was found to be highly reproducible and sensitive enough to identify species present in a mixture at 1% dry  
104 weight content.

105

106 **Conclusion:** The advanced multi-locus DNA metabarcoding method assessed in this study provides reliable and  
107 detailed data on the composition of complex food products, including information on the presence of CITES-  
108 listed species. The method provides improved resolution for species identification, while verifying species with  
109 multiple DNA barcodes contributes to an enhanced quality assurance.

110

111 **Keywords:** Endangered species, CITES, Traditional medicines, DNA metabarcoding, Customs agencies, COI,  
112 *matK*, *rbcL*, *cyt b*, mini-barcodes.

113

114

115

116

117

118

119

## 120 **Background**

121  
122 The demand for endangered species as ingredients in traditional medicines (TMs) has become one of the major  
123 threats to the survival of a range of endangered species such as seahorse (*Hippocampus* sp.), agarwood  
124 (*Aquilaria* sp.), and Saiga antelope (*Saiga tatarica*) [1-3]. The Convention on the International Trade in  
125 Endangered Species of Wild Fauna and Flora (CITES) is one of the best supported conservation agreements to  
126 regulate trading of animal and plant species ([www.cites.org](http://www.cites.org)) and thereby conserve biodiversity. Currently,  
127 ~35,000 species are classified and listed by CITES in three categories based on their extinction level (CITES  
128 Appendix I, II and III) by which the trade in endangered species is regulated. The success of CITES is dependent  
129 upon the ability of customs inspectors to recognize and identify components and ingredients derived from  
130 endangered species, for which a wide range of morphological, chromatographic and DNA-based identification  
131 techniques can be applied [4,5].

132         Recent studies have shown the potential of DNA metabarcoding for identifying endangered species in  
133 TMs and other wildlife forensic samples [4-7]. DNA metabarcoding is an approach that combines DNA  
134 barcoding with next-generation sequencing (NGS), which enables sensitive high-throughput multispecies  
135 identification on the basis of DNA extracted from complex samples [8]. DNA metabarcoding uses more or less  
136 universal PCR primers to mass-amplify informative DNA barcode sequences [9, 10]. Subsequently, the obtained  
137 DNA barcodes are sequenced and compared to a DNA sequence reference database from well-characterized  
138 species for taxonomic assignment [8, 10]. The main advantage of DNA metabarcoding over other identification  
139 techniques is that it permits the identification of all animal and plant species within samples that are composed of  
140 multiple ingredients, which would not be possible through morphological means or with traditional DNA  
141 barcoding [4-6]. Furthermore, the use of mini-barcode markers in DNA metabarcoding facilitate the  
142 identification of species in highly processed samples containing heavily degraded DNA [5, 6]. Such a molecular  
143 approach could aid the Customs Authorities to identify materials derived from endangered species in a wide  
144 variety of complex samples, such as food supplements and TMs [11].

145         Before routine DNA metabarcoding can be applied, there are some key issues that need to be taken  
146 into account. First, complex products seized by Customs, such as TM products, may contain plant and animal  
147 components that are highly processed, and from which the isolation of good quality DNA is challenging. Second,  
148 the universal DNA barcodes employed may not result in amplification of the related barcode for each species  
149 contained in a complex sample, due to DNA degradation or the lack of PCR primer sequence universality. For  
150 plants, for example, different sets of DNA barcodes have been suggested for different fields of application (i.e.

151 general taxonomic identification of land plants, identification of medicinal plants, etc.), and none of them meet  
1 the true requirements of universal barcodes [12]. Also, whilst PCR primers can be designed to accommodate  
2 shorter DNA barcode regions for degraded DNA samples, such mini-barcodes contain less information and their  
3 primers are more restrictive, often making them unsuitable for universal species barcoding [4, 13]. The third  
4 challenge is the reference sequence database quality and integrity, which is particularly problematic for law  
5 enforcement issues, where high quality and reliability are essential. The current underrepresentation of DNA  
6 barcodes from species protected under CITES and closely related species critically hampers their identification.  
7 The fourth challenge is that a dedicated bioinformatics pipeline is necessary to process raw NGS data for  
8 accurate and sensitive identification of CITES-listed species [9]. Finally, studies using the DNA metabarcoding  
9 approach are scarce and none of these methods have been truly validated [9, 14]. Therefore, before implementing  
10 DNA metabarcoding by Customs and other enforcement agencies, the above-mentioned challenges need to be  
11 thoroughly assessed to ensure accurate taxonomic identifications.  
12  
13  
14  
15  
16  
17  
18  
19  
20  
21  
22  
23

24 The objective of this research was to develop a multi-locus DNA metabarcoding method for  
25 (endangered) species identification and to evaluate the applicability and reproducibility of this approach in an  
26 international interlaboratory study. The research was part of a larger programme on the development of  
27 advanced DNA-based methods from the DECATHLON project ([www.decathlon-project.eu](http://www.decathlon-project.eu)), within the  
28 European Union's Framework Programme 7. In the process of establishing the standard operating procedure  
29 (SOP) for multi-locus DNA metabarcoding, all important aspects of the procedure (i.e. DNA isolation procedure,  
30 DNA barcode marker, barcode primers, NGS strategy and bioinformatics) were evaluated. The challenges  
31 concerning the quality and integrity of the DNA reference database(s) are discussed. The first step was aimed at  
32 identifying an ideal DNA isolation method to extract DNA from complex mixtures consisting of both animal and  
33 plant tissues. Secondly, animal and plant DNA barcode markers and corresponding primer sets were identified  
34 from literature that allowed good resolution for identifying (endangered) species from a wide taxonomic range.  
35 Thirdly, a panel of universal plant and animal DNA barcodes was selected and a single optimal PCR protocol  
36 was identified for efficient amplification of a panel of DNA barcode markers. Finally, the suitability of the  
37 Illumina MiSeq NGS technology was evaluated, and a bioinformatics pipeline with a user-friendly web interface  
38 was established to allow stakeholders to perform the NGS data analysis without expert bioinformatics skills.  
39  
40  
41  
42  
43  
44  
45  
46  
47  
48  
49  
50  
51  
52  
53

54 The DNA metabarcoding method was developed and tested based on data generated for 15 well-  
55 defined complex mixtures. The use of well-characterised mixtures allowed for optimising the bioinformatics  
56 procedure and subsequent robustness testing of multiple parameter settings and thresholds. The practical  
57  
58  
59  
60  
61  
62

181 performance and reproducibility of the DNA metabarcoding strategy was assessed in an international validation  
182 trial by 16 laboratories from 11 countries, on the basis of eight other newly composed complex mixtures and two  
183 seized TMs, which were suspected to contain ingredients derived from CITES species. In this study, the multi-  
184 locus DNA metabarcoding method is presented and it is assessed whether the method can improve the  
185 compositional analysis of complex and real-life samples by enabling the sensitive and reproducible identification  
186 of CITES-listed taxa by enforcement agencies and other laboratories.

### 188 **Data description**

189 To constitute well-defined complex mixtures, 46 reference specimens were commercially purchased  
190 from shops or were provided by the Dutch Custom Laboratory. In addition, two TMs that were suspected to  
191 comprise endangered species material were also obtained from Dutch Customs Laboratory. Each reference  
192 specimen was identified morphologically. Genomic DNA was extracted from 29 animal and 17 plant reference  
193 species for DNA barcoding. Standard cytochrome c oxidase I (COI) barcodes for all animal specimens were  
194 generated and individually sequenced using the Sanger method, and compared against the Barcode of Life Data  
195 Systems and NCBI database for taxonomic confirmation. For plant species, the DNA barcodes *rbcL* and *matK*  
196 were sequenced to confirm species identity. For a number of plant and animal species the generated barcode  
197 sequence information was deposited in the European Nucleotide Archive (ENA) under accession numbers  
198 LT009695 to LT009705, and LT718651 (Additional file 1; Table S1).

199 The complex mixtures for the pilot study and interlaboratory validation trial were prepared with 2 to 11  
200 taxonomically well-characterised species present in relative concentrations (dry mass: dry mass) from 1% to  
201 47%. For all experimental mixtures in the interlaboratory trial, internal control species were used to verify the  
202 efficiency of homogenization and to check for possible sample cross-contamination using species specific qPCR  
203 assays. DNA was isolated from the complex mixtures and the concentration and purity of extracted DNA was  
204 determined using spectrophotometer (NanoDrop 1000, Thermo Fisher Scientific Inc.). Subsequently, PCR  
205 amplifications using 12 DNA barcode primer sets were performed. The pooled and purified amplicons of each  
206 sample were sequenced using an Illumina MiSeq paired-end 300 technology, following the manufacturer's  
207 instructions (Illumina, Inc.). The NGS datasets were analysed using the CITESspeciesDetect pipeline that  
208 consists of three steps: 1) pre-processing of paired-end Illumina data involving quality trimming and filtering of  
209 reads, followed by reads sorting per DNA barcode, 2) Operational Taxonomic Unit (OTU) clustering by DNA  
210 barcode, and 3) taxonomy prediction and CITES identification. All raw NGS datasets from both analyses were

211 deposited in ENA under accession numbers ERS1545972 to ERS1545988, ERS1546502 to ERS1546533,  
212 ERS1546540 to ERS1546619, ERS1546624 to ERS1546639, ERS1546742 to ERS1546757, ERS1546759 to  
213 ERS1546774, and study number PRJEB18620 (Additional file 4; Table S1). A web interface was developed for  
214 the CITESpeciesDetect pipeline to allow stakeholders to perform the NGS data analysis of their own samples.  
215 The web interface can be globally accessed via the SURFsara high-performance computing and data  
216 infrastructure (<http://decathlon-fp7.citespipe-wur.surf-hosted.nl:8080/>).

## Analyses

### Establishing a laboratory procedure for multi-locus DNA barcode amplification

221 Based on the previous studies on DNA isolation for TMs [4, 15] and from the comparison between modified  
222 Qiagen DNeasy plant mini kit [16] and CTAB isolation [17] (unpublished results), we identified that the CTAB  
223 isolation method in general yields better DNA purity and provides better PCR amplification success. Therefore,  
224 the CTAB DNA isolation method was selected for successive experiments.

225 The DNA barcode markers included in this study were selected based on Staats et al. [9] supplemented  
226 with additional primers from literature [13] (Table 1). DNA barcode markers were selected based on the  
227 availability of universal primer sets and DNA sequence information in public repositories [9]. Important  
228 considerations in selecting suitable primer sets were that, preferably, they are used in DNA barcoding campaigns  
229 and studies, and as such have demonstrated universal applicability across a wide range of taxa. Furthermore,  
230 primer sets for both the amplification of full-length barcodes and their respective mini-barcodes (i.e. short  
231 barcode regions < 300 nt within existing ones) were selected when available. This was done to facilitate PCR  
232 amplification from a range of wildlife forensic samples containing relatively intact DNA (using full-length  
233 barcodes) and/or degraded DNA (mini-barcodes). Based on these criteria, PCR primer sets for the following  
234 animal DNA barcodes were selected: regions of the mitochondrial genes encoding 16S rRNA gene (16S),  
235 cytochrome c oxidase I (COI) and cytochrome *b* (*cyt b*). For plant species identification, primer sets for the  
236 following DNA barcodes were selected: regions of the plastidial genes encoding maturase K (*matK*), ribulose-  
237 1,5-bisphosphate carboxylase (*rbcL*), tRNA<sup>Leu</sup> (UAA) intron sequence (*trnL* (UAA)), *psbA-trnH* intergenic  
238 spacer region (*psbA-trnH*), and the nuclear internal transcribed spacer 2 (ITS2) region (Table 1). The selected  
239 primers sets were modified to include the Illumina adapter sequence at the 5' end of the locus-specific sequence  
240 to facilitate efficient NGS library preparation. A gradient PCR experiment was performed to identify the optimal  
241 PCR annealing temperature. While the selected PCR primer sets had previously been published with their own



242 annealing temperatures and conditions, the identification of a single optimal annealing temperature for all PCR  
1  
2 243 primer sets would allow for increased efficiency of analysis. Initially, a thermal gradient of 49.0 °C to 55.0 °C  
3  
4 244 was tested on the *Bos taurus* reference material with the primer sets for COI-2, 16S, mini-16S, and *cyt b*. The  
5  
6 245 amplification efficiency across the PCR primers sets was determined by comparing the intensity of the  
7  
8 246 amplicons across the thermal gradient. An optimal annealing temperature of 49.5 °C was identified, but  
9  
10 247 additional non-specific amplicons were observed with some primers (not shown). To reduce the amounts of non-  
11  
12 248 specific amplification products, the PCR program was modified to increase the annealing temperature after five  
13  
14 249 cycles from 49.5 °C to 54.0 °C [18], and tested on all 15 PCR primer sets (Table 1). It was observed that certain  
15  
16 250 PCR primer combinations still produced non-specific products (for *psbA-trnH* gene) or less intense PCR  
17  
18 251 products (for *rbcL* gene with primers *rbcLa-F* and *rbcLajf634R*, and *matK* gene with primers *matK-390f* and  
19  
20 252 *matK-1326r*). Consequently, these PCR primer sets were excluded from subsequent experiments.  
21

22 253         Next, the selected PCR thermocycling protocol was evaluated with the remaining 12 PCR primer sets  
23  
24 254 on a panel of 29 animal and 17 plant species, representing a phylogenetically wide range of taxa (Mammalia,  
25  
26 255 Actinopterygii, Malacostraca, Bivalvia, Aves, Reptilia, Amphibia, Insecta, Angiospermae, and Cycadopsida;  
27  
28 256 Additional file 1; Table S2 and S3). The overall PCR amplification success rates varied across reference species  
29  
30 257 and across DNA barcode markers (Additional file 1; Table S2). For instance, no PCR amplification was  
31  
32 258 observed with *cyt b* for the CITES-listed species *Balaenoptera physalus*, whereas intense amplification was seen  
33  
34 259 for the same species with 16S, COI-2, mini-16S and mini-COI (Additional file 1; Table S2). Overall, at least one  
35  
36 260 DNA barcode marker could successfully be amplified for each of the 46 plant and animal species (Additional file  
37  
38 261 1; Table S2 and S3). For a number of plant and animal species the generated barcode sequence information was  
39  
40 262 deposited in the European Nucleotide Archive (ENA) under accession numbers LT009695 to LT009705, and  
41  
42 263 LT718651 (Additional file 1; Table S1).  
43

#### 44 264

#### 45

#### 46 265 **Development and pre-validation of the CITESspeciesDetect bioinformatics pipeline**

#### 47

48 266 A dedicated bioinformatics pipeline, named CITESspeciesDetect, was developed for the purpose of rapid  
49  
50 267 identification of CITES-listed species using Illumina paired-end sequencing technology. Illumina technology  
51  
52 268 was selected because it produces NGS data with very low error rates, compared to other technologies [2, 19].  
53  
54 269 Furthermore, the Illumina MiSeq platform enables paired-end read lengths of up to 300 nt, allowing relatively  
55  
56 270 long DNA barcode regions of up to ~550 nt to be assembled. Also, the multiplexing capabilities of Illumina  
57  
58 271 technology are well developed, allowing for simultaneous sequencing of multiple samples in one run, thereby  
59  
60  
61  
62

272 enabling more cost-efficient NGS. While NGS data analysis pipelines exist that allow processing of Illumina  
1 DNA metabarcoding datasets (e.g. CLOTU, QIIME, Mothur), the majority have been developed for specifically  
2 273 studying microbial communities using the 16S rRNA gene region. CITESpeciesDetect, developed in this study,  
3 274 extends on the frequently-used software tools developed within the USEARCH [19] and BLAST+ packages  
4 275 [20], and additionally includes dedicated steps for quality filtering, sorting of reads per barcode, and CITES  
5 276 species identification (Figure 1). The CITESpeciesDetect is composed of five linked tools and data analysis  
6 277 passes through three phases: 1) pre-processing of paired-end Illumina data involving quality trimming and  
7 278 filtering of reads, followed by sorting by DNA barcode, 2) Operational Taxonomic Unit (OTU) clustering by  
8 279 barcode, and 3) taxonomy prediction and CITES identification.  
9 280

10 281 In establishing the pipeline, it was found that reads generated for *cyt b* and mini-*cyt b* could not be  
11 282 separated based on the forward PCR primer, as the forward primers are identical. It was therefore decided to  
12 283 combine (pool) the overlapping reads of *cyt b* and mini-*cyt b* during pre-processing (primer selection) of reads to  
13 284 prevent reads from being double selected. This means that the results of *cyt b* and mini-*cyt b* are presented by the  
14 285 CITESpeciesDetect pipeline as *cyt b*. The same issue was found for COI, for which the results are presented as  
15 286 COI-2.  
16 287

17 288 A parameter scan was performed in order to assess the effect of software settings on the ability to  
18 289 identify species. The evaluation allowed for the identification of important parameters and their effect on the  
19 290 sensitivity, specificity and robustness of the procedure. Changing the base quality score has a major impact on  
20 291 the number of reads per barcode (Additional file 1; Table S4). Increasing the strictness of the base quality score  
21 292 resulted in decreasing numbers of reads per barcode. Quality score values other than the default values (Q20 for  
22 293 95% of bases) did not yield better identifications. When applying strict quality filtering settings (Q20 for 100%  
23 294 of bases, or Q30 for 99% of bases) the species *Pieris brassicae* and *Anguilla anguilla* could not be detected with  
24 295 *cyt b* and/or mini-COI, indicating these settings were too strict (Additional file 1; Table S5). This is likely due to  
25 296 the resulting overall low read numbers for *cyt b* and mini-COI when applying these strict quality filtering  
26 297 settings (Additional file 1; Table S4).  
27 298

28 299 The effect of error tolerance on Illumina adapter trimming and primer selection was assessed by varying  
29 300 the maximum number of errors allowed in assigning reads to DNA barcodes. Setting higher error tolerances  
30 301 resulted in slightly higher number of reads being selected per DNA barcode marker (not shown). With 0% error  
31 302 tolerance, however, reads were observed that still contained untrimmed Illumina adapters or primer residues.  
32 303 These untrimmed residues were not observed when applying a 0.2% error tolerance (not shown).  
33 304  
34 305  
35 306  
36 307  
37 308  
38 309  
39 310  
40 311  
41 312  
42 313  
43 314  
44 315  
45 316  
46 317  
47 318  
48 319  
49 320  
50 321  
51 322  
52 323  
53 324  
54 325  
55 326  
56 327  
57 328  
58 329  
59 330  
60 331  
61 332  
62 333  
63 334  
64 335  
65 336

302 An OTU abundance threshold is generally applied to make DNA metabarcoding less sensitive to  
1 (potential) false-positive identifications. False-positives may occur e.g. as contaminants during pre-processing of  
2 303 samples (DNA extraction, PCR) or as cross-contamination during Illumina sequencing. Applying an OTU  
3 304 abundance threshold higher than zero generally results in loss of sensitivity. We have found, however, that  
4 305 applying an OTU abundance threshold of higher than zero may help in reducing noisy identifications and  
5 306 potential false-positive identifications (results not shown). In this study, an OTU abundance threshold of 0.2%  
6 307 was set as default.  
7 308

14 309 The effect of applying a minimum DNA barcode length revealed that allowing DNA barcodes of  $\geq 10$   
15 310 nt did not lead to additional identification of species, compared with default settings (e.g.  $\geq 200$  nt). Increasing  
16 311 the minimal DNA barcode length to 250 nt, however, resulted in a failure to identify most plant species with  
17 312 mini-*rbcL* and *rbcL*. We recommend using a minimum DNA barcode length of 200 nt, except for DNA barcodes  
18 313 with a basic length shorter than 200 nt, in which case the minimum expected DNA barcode length is set to 10 nt,  
19 314 e.g. in case of the *trnL* (P6 loop) marker.  
20 315

26 316 The results of the parameter scan resulted in specifying recommended parameter values (default setting)  
27 317 for analysing DNA metabarcoding datasets using the CITESspeciesDetect pipeline (see Methods section  
28 318 “Bioinformatics analysis”). An online version of the CITESspeciesDetect pipeline with a user-friendly web-  
29 319 interface was developed for skilled analysts with basic, but no expert level knowledge in bioinformatics and is  
30 320 made available via <http://decathlon-fp7.citespipe-wur.surf-hosted.nl:8080/>.  
31 321

### 38 321 **Pilot study to assess the performance of the DNA metabarcoding procedure using experimental mixtures**

40 322 The DNA metabarcoding procedure was assessed in a pilot study, for which 15 complex mixtures (EM1 to  
41 323 EM15) were prepared containing from 2 to 10 taxonomically well-characterised species with DNA barcode  
42 324 reference sequences available in the NCBI reference database (Table 2). The experimental mixtures 10 and 11  
43 325 (EM10 and EM11) were independently analysed twice to verify repeatability of the method (DNA isolation,  
44 326 barcode panel analysis and pooling). Only mixtures were used with well-characterised species (DNA Sanger  
45 327 barcoded and taxonomically verified) ingredients, at known dry weight concentrations, and with high quality  
46 328 DNA that would allow for an assessment of the performance of the DNA metabarcoding method under optimal  
47 329 conditions.  
48 330

56 330 A total of 2.37 Gb of Illumina MiSeq sequencing data was generated for the 17 complex samples (15  
57 331 complex mixtures along with the two replicates). On average, 464,648 raw forward and reverse Illumina reads  
58 332

332 were generated per sample, with minimum and maximum read numbers ranging between 273,104 (mixture  
1 EM4) and 723,130 (mixture EM10R; Table 3). During raw data pre-processing with the default settings of the  
2 333 CITESpeciesDetect pipeline, the reads were first quality filtered and overlapping paired-end Illumina reads  
3 334 were merged into pseudo-reads (Figure 1). The samples contained on average 269,099 quality controlled (QC)  
4 335 unmerged (forward and reverse) reads and merged pseudo-reads, collectively named (pseudo)reads. On average  
5 336 88.27% (min = 77.38%, max = 96.26%) of raw reads passed the quality filtering and pre-processing steps,  
6 337 indicating that the overall quality of the Illumina data was high (not shown).  
7 338

339 Next, the (pseudo)reads were assigned to DNA barcodes based on PCR primer sequences. On average,  
14 339 96.44% (min = 88.78%, max = 98.21%) of QC pre-processed reads were assigned to DNA barcodes, indicating a  
15 340 high percentage of reads containing the locus-specific DNA barcode primers (Table 3). After this, the  
16 341 (pseudo)reads were clustered by 98% sequence similarity into OTUs. On average, 82.26% (min = 75.11%, max  
17 342 = 90.63%) of the DNA barcodes assigned reads were clustered into OTUs (Table 3). It was assumed that the  
18 343 small fraction of reads that was not assigned to OTUs contained non-informative (e.g. non-specific fragments,  
19 344 chimeras) sequences that may have been generated during PCR amplification, and were filtered out during  
20 345 clustering.  
21 346

347 For taxonomy prediction, OTUs were assigned to dataset sequences using BLAST when aligning with  
31 347 at least 98% sequence identity, a minimum of 90% query coverage, and an E-value of at least 0.001. Generally,  
32 348 the best match (“top hit”) is used as best estimate of species identity. However, species identification using  
33 349 BLAST requires careful weighting of the evidence. To minimize erroneous taxonomic identifications a more  
34 350 conservative guideline was used that allowed a species to be assigned only when the best three matches  
35 351 identified the species. If the bit scores do not decrease after the top three hits, or if other species have identical  
36 352 bit scores, then identification was considered inconclusive. In such cases, OTUs were assigned to higher  
37 353 taxonomic levels (genus, family or order). All animal ingredients, except *Parapenaepsis* sp. could be identified  
38 354 at the species-level with one or more DNA barcode marker using the default settings of the CITESpeciesDetect  
39 355 pipeline (Table 4 and 5). For plants, *Lactuca sativa* could be identified at the species-level using the *trnL* (P6  
40 356 loop). All other plant taxa were identified at the genus or higher level (Table 4 and 5).  
41 357

358 Putative contaminating species were observed in most of the experimental mixtures (Additional file 2;  
52 358 Table S1). Even with the default OTU abundance threshold in place, the species *L. sativa*, *B. taurus* and *Gallus*  
53 359 *gallus* were identified in mixtures that were not supposed to contain these species. To verify whether these  
54 360 putative contaminations occurred during DNA isolation or Illumina sequencing, qPCR assays for the specific  
55 361

362 detection of *B. taurus* and *G. gallus* were performed on selected DNA extracts. These results indicated that for  
1  
2 363 some experimental mixtures (EM8, EM9 and EM14) cross-contamination had occurred during sample  
3  
4 364 preparation or DNA isolation, while for other experimental mixtures (EM15) cross-contamination may have  
5  
6 365 occurred during PCR, Illumina library preparation or sequencing. In addition to these contaminants, a species of  
7  
8 366 *Brassica* was identified in experimental mixtures containing *P. brassica*. This result is most likely not a false-  
9  
10 367 positive, because the caterpillars used for this study had been fed on cabbage.

11  
12 368 The DNA metabarcoding method was found to be sensitive enough to identify most plant and animal taxa at 1%  
13  
14 369 (dry mass: dry mass) in mixtures of both low (EM1, EM3 and EM5; Table 2) and relatively high complexity  
15  
16 370 (EM6, EM8, EM11, EM12, and EM14; Table 2). The exception being *Parapenaepsis* sp. (all mixtures), *A.*  
17  
18 371 *anguilla* in EM6, and *Cycas revoluta* in EM8 and EM11. Careful inspection of the NGS data revealed that in  
19  
20 372 nearly all cases OTUs related to *Parapenaepsis* sp., *A. anguilla*, and *C. revoluta* were present, but that these  
21  
22 373 sequences had been filtered out by the CITESspeciesDetect pipeline because their cluster sizes did not fulfil the  
23  
24 374 0.2% OTU abundance threshold. Lowering the OTU abundance threshold, however, would lead to (more) false-  
25  
26 375 positive identifications, and this was therefore not implemented.

27  
28 376 The repeatability of the laboratory procedure (excluding NGS) was assessed by analysing the  
29  
30 377 experimental mixtures 10 and 11 (EM10R and EM11R; Table 2), which was independently performed twice, i.e.  
31  
32 378 DNA isolation and PCR barcode amplification, but NGS was performed on the same MiSeq flow cell as the  
33  
34 379 other samples of the pilot study. From the comparison, it was observed that the percentage of QC reads was  
35  
36 380 nearly twice as high in the replicate analyses (Table 3). Also, the percentage of QC reads assigned to DNA  
37  
38 381 barcodes varied among replicate analyses (Figure 2). Most notable were the observed differences among  
39  
40 382 replicate analyses in the percentage reads assigned to *matK* and the *trnL* (P6 loop). For example, the percentage  
41  
42 383 of QC reads assigned to *matK* were 6.11% (14081 reads) and 0.02% (97 reads) in EM10 and EM10R  
43  
44 384 respectively (Figure 2). The low number of reads assigned to *matK* limited its use for taxonomy identification in  
45  
46 385 EM10R (Table 4). The multi-locus approach, however, allowed for the repeatable identification of taxa in EM10  
47  
48 386 and EM11, though not in all cases with all DNA barcode markers (Table 4 and 5).

49  
50 387 Based on the results obtained from the pilot study, precautions were taken when grinding the freeze-  
51  
52 388 dried materials and subsequent mixing to avoid cross-contamination during the laboratory handling of samples,  
53  
54 389 which were used to improve the SOP for the interlaboratory trial (Additional file 3). Also, control species were  
55  
56 390 added to experimental mixtures that were prepared for the inter-laboratory trial to allow better confirmation of  
57  
58 391 sample homogeneity and to verify that no cross-contamination had occurred during sample preparation.

1  
2 **393 Assessment of interlaboratory reproducibility of the DNA metabarcoding procedure**

3  
4 394 Altogether 16 laboratories from 11 countries (all experienced, well-equipped and proficient in advanced  
5  
6 395 molecular analysis work), including two of the method developers, participated in the inter-laboratory trial  
7  
8 396 (Table 6). The laboratories received ten anonymously labelled samples, each consisting of 250 mg powdered  
9  
10 397 material. Two of the samples, labelled S3 and S8, were authentic TM products seized by the Dutch Customs  
11  
12 398 Laboratory while the other eight samples were well-characterized mixtures of specimens from carefully  
13  
14 399 identified taxa in relative dry weight concentrations from 1% to 47% (Table 7). In all experimental mixtures, 1%  
15  
16 400 of *Zea mays* was added as quality control for homogeneity, which was confirmed with maize-specific *hmg* (high-  
17  
18 401 mobility group gene) qPCR [16]. Also, tests performed with species-specific qPCR assays indicated that cross-  
19  
20 402 contamination did not occur during sample preparation (Additional file 1; Table S6). The qPCR assay for the  
21  
22 403 detection of *Brassica napus*, however, also gave a positive signal for other *Brassica* sp. in the mixtures.

23  
24 404 Together with the sample materials, reagents for DNA extraction, and the complete set of barcode  
25  
26 405 primers, the participants received an obligatory (SOP). Any deviations from the SOP had to be reported. The  
27  
28 406 participants were instructed to extract DNA, perform PCR using the barcode primers, purify the amplified DNA  
29  
30 407 by removal of unincorporated primers and primer dimers, and assess the quality and quantity of the amplification  
31  
32 408 products by gel electrophoresis and UV-spectrophotometry. The purified PCR products were then collected by  
33  
34 409 the coordinator of the trial (RIKILT Wageningen University & Research, the Netherlands) and shipped to a  
35  
36 410 sequencing laboratory (BaseClear, the Netherlands) for Illumina sequencing using MiSeq PE300 technology.  
37  
38 411 The sequencing laboratory performed Index PCR and Illumina library preparation prior to MiSeq sequencing as  
39  
40 412 specified in the Illumina 16S metagenomics sequencing library preparation guide. The altogether 160 PCR  
41  
42 413 samples were sequenced using two Illumina flow cells with MiSeq reagent kit v3.

44 414 The interlaboratory trial should ideally have included the use of the online version of the pipeline, but  
45  
46 415 unfortunately this was not possible due to shortage of time. Therefore, a single (developer) laboratory performed  
47  
48 416 these bioinformatics analyses. The 160 individual samples contained on average 269,057 raw reads, and more  
49  
50 417 than 150,000 reads per sample in 95% of the samples (Additional file 1; Table S7). One sample contained less  
51  
52 418 than 100,000 reads (51,750), which was considered more than sufficient for reliable species identification. After  
53  
54 419 pre-processing, the samples contained on average 142,938 (pseudo)reads. On average 94.66% of the reads (min  
55  
56 420 = 88.12%, max = 98.02%) passed the quality filtering indicating that the overall quality of the sequence data was  
57  
58 421 consistently high across the 160 datasets.

422 OTU-clustering at 98% sequence similarity on average assigned 78.14% of the pre-processed and DNA barcode  
1  
2 423 assigned reads into OTUs (Additional file 1; Table S7). Only two samples, both from the same laboratory, had a  
3  
4 424 slightly lower percentage of the (pseudo-)reads assigned to OTUs (66.02% and 66.05%). This indicates that the  
5  
6 425 pipeline correctly removed PCR artefacts in the clustering phase.

7  
8 426 For taxonomy prediction, an OTU would be assigned to a database hit if they aligned with  $\geq 98\%$   
9  
10 427 sequence identity and  $\geq 90\%$  query coverage, and yielded an expect value (E-value) of at least 0.001. The  
11  
12 428 BLAST output of the NGS data was interpreted by participants according to the guidelines in the SOP. Variation  
13  
14 429 was observed among laboratories in interpreting the BLAST output: some laboratories consistently scored the  
15  
16 430 top hits, irrespective of bitscore, while other labs selected all hits belonging to the top three bitscores, or  
17  
18 431 interpreted only the first OTU of each DNA barcode, leading to large differences in identified taxa. Because of  
19  
20 432 these inconsistencies, the BLAST results were re-interpreted by RIKILT Wageningen University & Research  
21  
22 433 following the established guideline as mentioned in the SOP. These re-interpreted data are the data referred to in  
23  
24 434 the following sections.

25  
26 435 With one exception, all taxa mixed in at  $\geq 1\%$  (dry mass: dry mass) were reproducibly identified by at  
27  
28 436 least 13 (81%) laboratories (Table 7). *Beta vulgaris* in sample S6 could only be identified by 4 out of 16 (25%)  
29  
30 437 laboratories. *Beta vulgaris* specific sequences were present in all remaining datasets, but at very low read counts.  
31  
32 438 So these clusters did not fulfil the 0.2% OTU abundance threshold (results not shown). All six animal species  
33  
34 439 could be identified to species level with at least one barcode marker (COI), while only four of the 12 plant  
35  
36 440 species (*Brassica oleracea*, *Carica papaya*, *Gossypium hirsutum*, and *L. sativa*) could be identified to species  
37  
38 441 level (Additional file 2; Table S2). All other plant species were identified at the genus or higher level. For plants,  
39  
40 442 no single barcode marker was best, and the most reliable data were obtained by combining the plant barcodes.

41  
42 443 Three taxa that were misidentified or not intentionally included in the mixtures were reproducibly  
43  
44 444 identified across all laboratories. *Acipenser schrenckii* co-occurred in all samples containing *Huso dauricus*. We  
45  
46 445 have confirmed with DNA metabarcoding that the caviar used for preparing the experimental mixtures contains  
47  
48 446 both *H. dauricus* and *A. schrenckii* (results not shown). Furthermore, *Brassica rapa* was identified by ITS2 in  
49  
50 447 sample S4 by all 16 (100%) laboratories, instead of *Brassica napus*. We confirmed by Sanger sequencing *rbcL*  
51  
52 448 and *matK* that our reference specimen is indeed *Brassica napus*, but that its ITS2 sequence is identical to  
53  
54 449 *Brassica rapa* (LT718651). Finally, a taxon of the plant family Phellinaceae was reproducibly identified (by all  
55  
56 450 laboratories) using the mini-*rbcL* marker in all samples containing *L. sativa* (S6, S7, S9, S10). Species of the  
57  
58 451 family Phellinaceae and *L. sativa* both belong to the order Asterales. The evidence for Phellinaceae was not

452 strong, i.e. the family-level identification was based on a single NCBI reference sequence only (GenBank:  
1 X69748). We therefore suspect a misidentification during the interpretation of the BLAST results.  
2

3  
4 454 Taxa that were identified to be the result of possible contaminations were scarcely observed, i.e. these  
5  
6 455 were found in isolated cases and could possibly be explained by cross-sample contamination that may have  
7  
8 456 occurred during any step of sample processing (DNA isolation, PCR, NGS library preparation or NGS). For  
9  
10 457 example, a contamination with *Gossypium* sp. was observed using *tmL* (P6 loop) in sample S1 of one of the  
11  
12 458 participating labs. A total of 6 of such suspected cases of incidental cross-contaminations were observed (not  
13  
14 459 shown).

15  
16 460 For the authentic TMs S3 and S8, it was observed that only few labelled ingredients could reproducibly  
17  
18 461 be identified (Table 8 and 9). For sample S3 (Ma pak leung sea-dog), only the listed ingredients *Cuscuta* sp.  
19  
20 462 (Chinese dodder seed), and *Astragalus danicus* (Astragalus root) could be identified. For sample S8 (Cobra  
21  
22 463 performance enhancer), only the listed ingredients *Epimedium* sp. (Horny goat weed; Berberidaceae), *Panax*  
23  
24 464 *ginseng* (Korean ginseng; Araliaceae), and species of the plant families *Arecaceae* (*Serenoa repens*) and  
25  
26 465 *Rubiaceae* (*Pausinystalia johimbe*) could be identified. While most declared taxa were not identified, many non-  
27  
28 466 declared taxa were identified. For sample S3, the animal species *B. taurus*, and the plants *Cullen* sp. (Fabaceae),  
29  
30 467 *Melilotus officinalis* (Fabaceae), *Medicago* sp. (Fabaceae), *Bupleurum* sp. (Apiaceae), and *Rubus* sp. (Rosaceae)  
31  
32 468 were identified by at least 14 (88%) laboratories (Table 8). Furthermore, the fungi *Aspergillus fumigatus*  
33  
34 469 (*Aspergillaceae*) and *Fusarium* sp. (*Nectriaceae*) were reproducibly identified, of which the former is also a  
35  
36 470 known human pathogenic fungus. For sample S8, the animal species *B. taurus* and *Homo sapiens*, the plant  
37  
38 471 species *Sanguisorba officinalis* and *Eleutherococcus sessiliflorus*, and members of the plant genera *Croton* and  
39  
40 472 *Erythroxylum*, and families *Meliaceae* and *Asteraceae*, were reproducibly identified (Table 9).  
41

## 42 473 43 474 **Discussion**

44 475  
45 476 In this study, a DNA metabarcoding method was developed using a multi-locus panel of DNA barcodes for the  
46  
47 477 identification of CITES protected species in highly complex products such as TMs. As a first step, we selected  
48  
49 478 an optimal DNA isolation method for complex mixtures consisting of both animal and plant tissues. A CTAB  
50  
51 479 isolation method was found to be the most efficient in obtaining high quality DNA from pure plant and animal  
52  
53 480 reference materials as well as from complex mixtures. Secondly, a single PCR protocol, suitable for all the  
54  
55 481 barcodes included, i.e. multiple universal plant and animal barcode and mini-barcode markers, was identified.  
56  
57 482 This facilitated the design of a multi-locus panel of DNA barcodes. With this panel, the presence of a species  
58  
59 483 was confirmed with a multiplex marker approach, which improves the resolution for identification and quality  
60  
61



484 assurance. Furthermore, the developed DNA metabarcoding method includes a dedicated bioinformatics  
1 workflow, named CITESspeciesDetect, that was specifically developed for the analysis of Illumina paired-end  
2 reads. The developed pipeline requires skilled experts in bioinformatics, and applies scripts for command-line  
3  
4 486 processing. NGS data analysis pipelines may provide a lot of flexibility to the user, as modifications are easily  
5  
6 487 implemented by expert users. To simplify the inter-laboratory validation of the pipeline, a user-friendly and  
7  
8 488 intuitive web-interface with associated “Help” functions and “FAQs” was developed for the CITESspeciesDetect  
9  
10 489 pipeline. The web interface was, however, not available in the course of the interlaboratory trial. Therefore, the  
11  
12 490 sequence data generated in the interlaboratory study could not be analysed by the individual laboratories using  
13  
14 491 the CITESspeciesDetect pipeline. A single (developer) laboratory therefore performed these analyses. Upon the  
15  
16 492 availability of the online web-interface, individual participants were later given the opportunity to reanalyse their  
17  
18 493 DNA metabarcoding data. Observations made in this part demonstrated concordance of results with those  
19  
20 494 obtained by the developing laboratory, reinforcing the perception of CITESspeciesDetect as a user-friendly and  
21  
22 495 reliable pipeline that may readily be used by enforcement agencies and other laboratories.  
23  
24 496

26 497         The performance of the DNA metabarcoding method was assessed in an interlaboratory trial in which  
27  
28 498 the method was found to be highly reproducible across laboratories, and sensitive enough to identify species  
29  
30 499 present at 1% dry weight content in experimental samples containing up to 11 different species as ingredients.  
31  
32 500 However, not all laboratories could identify all taxa in all cases. All animal taxa from phylogenetically unrelated  
33  
34 501 orders could be identified at the species level, in line with the objective that the method should target all animal  
35  
36 502 species. COI (full-length COI-2 and mini-COI) was found to be the most effective DNA barcode marker for  
37  
38 503 animal species identification. This is not surprising considering that COI is the standard barcode for almost all  
39  
40 504 animal groups [21]. Nearly all animal species identifications were supported by multiple DNA barcodes, thereby  
41  
42 505 giving strong confidence to the correctness of the animal species identifications. In contrast, plants could mainly  
43  
44 506 be identified at the family level, and no single DNA barcode marker was found to provide best resolution for  
45  
46 507 identifying plant taxa. Ideally, adequate plant species discrimination would require the combined use of multiple  
47  
48 508 DNA barcode markers, e.g. *rbcL* + *matK* [22], but this is technically not possible due to the nature of the target  
49  
50 509 samples (heavily processed) and with the current Illumina Miseq technology. For the identification of plant taxa  
51  
52 510 listed by CITES, the use of DNA barcodes with relatively modest discriminatory power at the genus or higher  
53  
54 511 taxonomic level can still be useful, as it is often an entire plant genus or family that is listed by CITES, rather  
55  
56 512 than individual plant species. This was the case for e.g. Orchidaceae and Cactaceae in this study. Yet, for some  
57  
58 513 plant species (e.g. *Aloe variegata*) the resolution provided by the used plant DNA barcodes may still be too low  
59  
60  
61  
62  
63  
64  
65

514 for unambiguous CITES identification. It is important to note that the maximum achievable Illumina NGS read  
1  
2 515 length limits the taxonomic resolution of DNA barcodes that are longer than ~550 nt. This particularly limited  
3  
4 516 the discriminatory power of the full-length plant barcodes *matK* and *rbcL*. The DNA metabarcoding method may  
5  
6 517 therefore benefit from (currently unavailable) Illumina read lengths longer than 300 nt, or other long-read  
7  
8 518 sequencing technologies. Single barcodes in several cases failed to amplify or provide resolution. The latter is  
9  
10 519 likely to be caused mainly by database incompleteness, lack of genetic variability within some loci/target  
11  
12 520 sequences, and sample composition. However, combining multiple barcodes into a multi-locus metabarcoding  
13  
14 521 method mitigated the problems observed for individual barcodes. A high degree of confidence in the taxonomic  
15  
16 522 assignments based on the combined barcodes were therefore observed, providing for enhanced quality assurance  
17  
18 523 compared to the use of single barcodes.

20 524           While the use of well-characterised experimental mixtures allowed for an assessment of the  
21  
22 525 performance of the DNA metabarcoding method under ideal conditions, the amplifiable DNA content of real-life  
23  
24 526 samples encountered in routine diagnostic work are often of an unpredictable and variable quality. An analysis of  
25  
26 527 two authentic TM products seized by the Dutch Customs Laboratory demonstrated that only few ingredients  
27  
28 528 listed on the labels could be reproducibly identified. This does not mean that the undetected species were not  
29  
30 529 used as ingredients. Ingredients may have been processed in such a way that the DNA is either degraded or  
31  
32 530 effectively removed. This is e.g. the case with refined oils or cooked ingredients [23]. The quality of the  
33  
34 531 sequence reference database also strongly affects the ability to correctly identify species. Without correct  
35  
36 532 references that also exhibit the necessary intraspecific variation, it is not possible to match and discriminate  
37  
38 533 sequence reads correctly. It is well-known that accurate DNA barcoding depends on the use of a reference  
39  
40 534 database that provides good taxonomic coverage [5, 9]. The current underrepresentation of DNA barcodes from  
41  
42 535 species protected by CITES and closely related species critically hampers their identification. This will improve  
43  
44 536 as DNA barcoding campaigns continue, in particular through initiatives such as the Barcode of Wildlife Project  
45  
46 537 (BWP; [www.barcodeofwildlife.org](http://www.barcodeofwildlife.org)). Only by expansion of the sequence reference database of endangered and  
47  
48 538 illegally-traded species can DNA barcoding provide the definitiveness required in a court of law.

50 539           A noteworthy observation was that most species that were reproducibly identified did not appear on the  
51  
52 540 ingredients lists on the labels of the analysed TMs. This is possibly due to mislabelling. If the identifications are  
53  
54 541 correct this also indicates that consumption may pose health risks. These findings corroborate earlier reports that  
55  
56 542 DNA metabarcoding may provide valuable information about the quality and safety of TMs [5, 6].

58  
59 543

## Potential implications

Overall, our findings demonstrate that the multi-locus DNA metabarcoding method assessed in this study can provide reliable and detailed data on the composition of highly complex food products and supplements. This study highlights the necessity of a multi-locus DNA metabarcoding strategy for species identification in complex samples, since the use of multiple barcode markers enables an increased resolution and quality assurance, even in heavily processed samples. The developed robust bioinformatics pipeline for Illumina data analysis with user-friendly web interface allows the method to be directly applied in various fields such as: a) food mislabelling and fraud in the food industry [24], b) environmental monitoring of species [25], and c) wildlife forensics [26]. Furthermore, the pipeline can be readily used to analyse different types of Illumina paired-end datasets, even the future Illumina datasets (read length > 300 nt). Additionally, the web interface provides an opportunity for the global audience with limited expertise in bioinformatics, to analyse their own data. It also provides the liberty to select different primer sets and customise the settings for the selected purposes. As a result, the range of potential applications of the method to identify plant and animal species is diverse, the pipeline is versatile and adjustable to the user's needs, thus providing a powerful tool for research as well as enforcement purposes.

## Methods

### Reference materials and preparation of experimental mixtures

All reference specimens were obtained from a local shop in the Netherlands or provided by the Dutch Customs Laboratory (Additional file 1; Table S2 and Table S3). The reference specimens were taxonomically characterised to the finest possible taxonomic level. For each species, it was checked whether reference sequences were present in NCBI GenBank. For taxonomic confirmation, standard COI barcodes for all animal specimens were generated and individually Sanger sequenced, and compared against the NCBI and BOLD nucleotide database. For plant species, the DNA barcodes *rbcL* and *matK* were Sanger sequenced to confirm species identity. For a number of plant and animal species the generated barcode sequence information was deposited in the European Nucleotide Archive (ENA) under accession numbers LT009695 to LT009705, and LT718651 (Additional file 1; Table S1).

For the initial pilot study, in which the SOP for the DNA metabarcoding approach was established and tested, 15 well-defined complex mixtures were artificially prepared (Table 2). These experimental mixtures were prepared with 2 to 10 taxonomically well-characterised species (Table 2). The ingredients were mixed based on dry weight ratio, for which individual materials were freeze-dried for 78 hours. The lyophilized ingredients were

577 ground using an autoclaved mortar and pestle or blender in a cleaned fume hood, and subsequently stored at -  
1 20 °C °C. The individual ingredients of each complex mixture were weighted and mixed thoroughly using a  
2 578 tumbler (Heidolph Reax 2) for 20 hours and stored at -20 °C until further use.  
3  
4 579

5 580 For the interlaboratory validation trial, in which the applicability and reproducibility of the DNA  
6 metabarcoding method was assessed, eight additional well-characterised mixtures were artificially prepared  
7 581 using the above procedure. These complex mixtures were prepared with 8 to 11 taxonomically well-  
8 582 characterised species present at dry weight concentrations from 1% to 47% (Table 7). These complex mixtures  
9 583 were prepared in such a way that the efficiency of homogenization and possibility of sample cross-contamination  
10 584 could be verified using species-specific qPCR assays. In all samples, 1% of *Zea mays* was added as quality  
11 585 control for homogeneity. The presence of *Z. mays* was checked after sample mixing using maize-specific *hmg*  
12 586 qPCR along with a positive and negative control. A unique species was added at 1% dry weight to each mixture  
13 587 (*S1-Glycine max*, *S2-Gossypium sp.*, *S4-Brassica napus*, *S5-Triticum aestivum*, *S6-Beta vulgaris*, *S7-Meleagris*  
14 588 *gallopavo*, *S9-Carica papaya*, *S10-Solanum lycopersicum*) (Table 7). Species-specific qPCR was performed in  
15 589 duplex (together with positive and negative controls) in all samples, to check for possible cross-contamination  
16 590 between samples after sample preparation. Information about the qPCR primers and probes, and qPCR  
17 591 procedure can be found in the Additional file 1; Table S8-S10. In addition to the eight experimental mixtures,  
18 592 two TMs were included that were obtained from the Dutch Customs Laboratory: a) Ma pak leung sea-dog hard  
19 593 capsules (MA PAK LEUNG CO, LTD, Hong Kong), was labelled to contain among others rhizoma Cibotii  
20 594 (*Cibotium barometz*, CITES appendix II), and Herba Cistanches (*Cistanche sp.*, CITES appendix II) and b)  
21 595 Cobra performance enhancer hard capsules (Gold caps, USA), was labelled to contain among others Siberian  
22 596 ginseng (*Eleutherococcus senticosus*) and Korean ginseng (*Panax ginseng*). In both TMs, the medicine powder  
23 597 was encapsulated in a hard-capsule shell. All capsules were opened and the powder inside the capsules were  
24 598 stored in air-sealed and sterilized containers. The powdered medicines were thoroughly mixed using tumbler  
25 599 (Heidolph Reax 2) for 20 hours and stored at -20 °C until further use.  
26 600  
27  
28  
29  
30  
31  
32  
33  
34  
35  
36  
37  
38  
39  
40  
41  
42  
43  
44  
45  
46  
47  
48  
49  
50  
51  
52  
53  
54  
55  
56  
57  
58  
59  
60  
61  
62  
63  
64  
65

#### 604 **DNA isolation method**

605 A cetyltrimethylammonium bromide (CTAB) extraction method [17] was assessed for its ability to efficiently  
606 extract DNA from a range of plant and animal materials (Additional file 3). In brief, the CTAB method consists  
607 of an initial step to separate polysaccharides and organic soluble molecules using a CTAB extraction buffer (1X

608 CTAB, 1.4M NaCl, 0.1 M Tris-HCl [pH 8.0], and 20mM NA<sub>2</sub>EDTA) and chloroform. Next, the DNA was  
609 precipitated with 96% ethanol, purified with 70% ethanol, and the obtained DNA was stored at 4 °C until further  
610 use. DNA was extracted from 100 mg reference materials (plant and animal), artificially made complex mixtures,  
611 and real-life samples (TMs). The concentration and purity (OD<sub>260/280</sub> and OD<sub>260/230</sub> ratios) of the obtained DNA  
612 was determined by spectrophotometer (NanoDrop 1000 instrument, Thermo Fisher Scientific Inc.). The OD<sub>260/280</sub>  
613 ratios between 1.7 and 2.0 were considered to indicate purity of the obtained DNA.

### 615 **Barcode markers**

616 Candidate universal DNA barcode and mini-barcode markers and primer sets were identified using the  
617 information provided in Staats et al. (2016) [9], supplemented with additional primer sets from literature (Table  
618 1). The PCR primer sets were modified to have an additional Illumina tail sequence at 5' end of the primers  
619 (Table 1).

### 621 **PCR**

622 A gradient PCR was performed with all PCR primer combinations using 10 ng of DNA. The tested PCR  
623 conditions programme were according to the following protocol: 95 °C for 15 min, five cycles of 94 °C for 30 s,  
624 annealing range (49-55 °C) for 40 s, and 72 °C for 60 s, followed by 35 cycles of 94 °C for 30 s, 54 °C for 40 s,  
625 and 72 °C for 60 s, with a final extension at 72 °C for 10 min. The total volume of the PCR mixture was 25 µl,  
626 which included 12.5 µl of HotStarTaq Master Mix (Qiagen), 0.5 µl of 10 µM each sense and antisense primer, 7  
627 µl of RNase-free water (Qiagen) and 5 µl of 10 ng/µl of represented species DNA. PCR was performed in the  
628 CFX96 thermal cycler (Bio-Rad) and the amplified products from all the analysed reference specimens,  
629 artificially made complex mixtures, and real-life samples (TMs) were visualised on 1% agarose gels. Prior to  
630 NGS library preparation, 8 µl of PCR product of each target (12 in total) per sample was pooled and mixed. Next,  
631 the pooled PCR products were purified using the QIAquick PCR purification kit (Qiagen) according to  
632 manufacturer's protocol, and the purified amplicons were visualized on 1% agarose gels.

### 635 **Next Generation Sequencing**

636 The pooled and purified PCR amplicons were sequenced using Illumina MiSeq paired-end 300 technology. Prior  
637 to MiSeq sequencing, Index PCR and Illumina library preparation were performed as specified in the Illumina

638 16S metagenomics sequencing library preparation guide (Illumina document 15044223). All the DNA barcode  
1 amplicons of each sample were treated as one sample during library preparation i.e. all DNA barcode amplicons  
2 639  
3 of each sample were tagged with the addition of the same, unique identifier, or index sequence, during library  
4 640  
5 preparation. The Index PCR was performed to add dual indices (multiplex identifiers) and Illumina sequencing  
6 641  
7 adapters using the Nextera XT Index Kit (Illumina, FC-131-1001). Illumina libraries were quantified and pooled  
8 642  
9 prior to MiSeq sequencing using MiSeq reagent kit v3.  
10 643

11 644

### 14 645 **Bioinformatics analysis**

15 646  
16 647 The raw demultiplexed Illumina reads with Illumina 1.8+ encoding were processed using a bioinformatics  
17  
18 648 pipeline, called CITESspeciesDetect. The CITESspeciesDetect is composed of five linked tools with data  
19  
20 649 analysis passing through three phases: 1) pre-processing of paired-end Illumina data involving quality trimming  
21  
22 650 and filtering of reads, followed by sorting by DNA barcode, 2) OTU clustering by barcode, and 3) taxonomy  
23  
24 651 prediction and CITES identification (Figure 1).

25  
26 652 During preprocessing of reads, the 5' and 3' Illumina adapter sequences are trimmed using Cutadapt v1.9.1 [27]  
27  
28 653 using the respective substrings TGTGTATAAGAGACAG and CTGTCTCTTATACACA. After Illumina  
29  
30 654 adapter trimming, reads  $\leq 10$  bp are removed using Cutadapt. Then, the forward and reverse reads are merged to  
31  
32 655 convert a pair into a single pseudoread containing one sequence and one set of quality score using USEARCH  
33  
34 656 v8.1.1861 [19].

35  
36 657 Next, the merged pseudo-reads, unmerged forward reads and unmerged reverse reads are processed  
37  
38 658 separately during quality filtering using a sliding window method implemented in PRINSEQ [28]. During this  
39  
40 659 procedure, low quality bases with Phred scores lower than 20 are trimmed from 3'-end using a window size of  
41  
42 660 15 nt and a step size of 5 nt. After PRINSEQ, reads with a minimum of 95% per base quality  $\geq 20$  are kept,  
43  
44 661 while the remaining reads are removed using FASTX\_Toolkit v0.0.14 ([http://hannonlab.cshl.edu/fastx\\_toolkit/](http://hannonlab.cshl.edu/fastx_toolkit/)).  
45  
46 662 Then, reads are successively selected, trimmed and sorted per DNA barcode marker using Cutadapt [27]. The  
47  
48 663 following steps are followed for each DNA barcode marker separately during this procedure. First, reads  
49  
50 664 containing an anchored 5' forward primer or anchored 5' reverse primer (or their reverse complement) are  
51  
52 665 selected with a maximum error tolerance of 0.2 (=20%) and with the overlap parameter specified to 6 to ensure  
53  
54 666 specific selection of reads. Also, reads  $\leq 10$  nt are removed. The anchored 5' primer sequences are subsequently  
55  
56 667 trimmed. Second, primer sequences that are present at the 3' end of the selected reads are also removed. For each  
57  
58  
59  
60  
61  
62

668 DNA barcode, the primer-selected and unmerged reverse reads are reverse complemented and combined with  
1  
2 669 primer-selected merged and unmerged forward reads.

3  
4 670 The following procedure is used to cluster the quality trimmed reads of each DNA barcode into OTUs  
5  
6 671 using the UPARSE pipeline implemented in USEARCH [19] with the following modifications: reads are  
7  
8 672 dereplicated using the derep\_prefix command. Also, singleton reads and reads with minimum cluster size  
9  
10 673 smaller than 4 are discarded. Representative OTUs are generated using an OTU radius of 2 (98% identity  
11  
12 674 threshold) and 0.2% OTU abundance threshold with minimum barcode length per primer set. Filtering of  
13  
14 675 chimeric reads is performed using the default settings of the UPARSE-REF algorithm implemented in the  
15  
16 676 cluster\_otus command of USEARCH.

17  
18 677 To assign OTUs to taxonomy, standalone BLASTn megablast searches [20] of representative OTUs are  
19  
20 678 performed on the National Centre for Biotechnology Information (NCBI) GenBank nucleotide database using an  
21  
22 679 Expectation value (E-value) threshold of 0.001 and a maximum of 20 aligned sequences. OTUs are assigned to  
23  
24 680 the database sequence to which they align, based on bit score, and having at least 98% sequence identity and  
25  
26 681 minimum of 90% query coverage. To identify putative CITES-listed taxa, the taxon ID first was matched against  
27  
28 682 the NCBI taxonomy database using Entrez Direct (edirect) functions (available at  
29  
30 683 <ftp://ftp.ncbi.nlm.nih.gov/entrez/entrezdirect/>) to retrieve scientific name (species, genus, family, order and  
31  
32 684 synonym name). The scientific, synonym and/or family names are then matched against a local CITES database  
33  
34 685 that is retrieved from <https://speciesplus.net>. The final results are presented as a tab-separated values file (TSV)  
35  
36 686 containing the BLAST hit metadata (i.e. bit-score, e-value, accession numbers etc.), the scientific name,  
37  
38 687 synonym name, and in case a CITES-listed taxon was found, also the CITES appendix listing and taxonomic  
39  
40 688 group (i.e. species, genus, family or order name) under which the taxon is listed by CITES.

41  
42 689 The BLAST output was interpreted by following guidelines: first, to minimize the chance of erroneous  
43  
44 690 species identifications, the same species should have at least three top hits, i.e. highest bit scores. Secondly, if  
45  
46 691 multiple hits are obtained with identical quality results, but with different assigned species, or with less than  
47  
48 692 three top hits with same species designation, the OTU fragment was considered to lack the discriminatory power  
49  
50 693 to refer the hit to species level. In such cases, the OTU would then be downgraded to a genus-level identification.  
51  
52 694 Thirdly, if multiple hits are obtained with identical quality results, but with different assigned genera, the OTU  
53  
54 695 fragment lacks the discriminatory power to describe the hit to genus level. In such cases, the OTU would then be  
55  
56 696 downgraded to a family-level identification. An online web-interface based application for the  
57  
58  
59  
60  
61  
62

697 CITESpeciesDetect pipeline was developed which is available from <http://decathlon-fp7.citespipe-wur.surf-hosted.nl:8080/>.

699

#### 700 **Pre-validation in-house of the CITESpeciesDetect pipeline**

701 A parameter scan was performed in order to assess the effect of software settings on the ability to identify  
702 species. This evaluation allowed for identification of important parameters and their effects on the sensitivity,  
703 specificity and robustness of the procedure. This in turn resulted in specified, recommended (default) parameters  
704 values for analysing DNA metabarcoding datasets using the CITESpeciesDetect pipeline. The effects of the  
705 following parameters were assessed: base quality scores, error tolerance for primer selection, OTU radius, OTU  
706 abundance threshold, expect E-value and query coverage threshold, percentage identity threshold, minimum  
707 DNA barcode length and BLAST database. The parameters scan was performed on experimental mixture 11 of  
708 the pilot study (Table 2). This mixture was selected because of its (relatively) high sample complexity, making it  
709 the most challenging complex mixture to analyse. Furthermore, the parameter scan was limited to four barcode  
710 primer sets: full-length cytochrome-B (*cyt b*), COI mini barcode (mini-COI), *rbcL* mini barcode (mini-*rbcL*) and  
711 the full-length *rbcL* (*rbcL*) barcode.

#### 713 **Inter-laboratory validation trial: participants and method.**

714 To assess the overall performance of the developed DNA metabarcoding approach, 16 laboratories from 11  
715 countries participated in an international inter-laboratory validation. Only laboratories that regularly perform  
716 molecular analyses and have well-equipped laboratory facilities were selected to participate (Table 6). The  
717 majority are governmental or semi-official institutes and are considered highly authoritative within each  
718 respective country. Participants were requested to follow the SOP (Additional file 3), and were asked to  
719 document any deviations that were made. The chemicals and reagents that were provided to the laboratories were:  
720 10 samples (eight experimental mixtures and two TMs), *B. taurus* and *L. sativa* positive control DNA, CTAB  
721 extraction and precipitation buffer, 1.2 M NaCl solution, 12 universal plant and animal barcode and mini-  
722 barcode primer sets (Table 1), Qiagen HotStarTaq master mix, and Qiagen PCR purification kits. All reagents  
723 and samples were provided in quantities corresponding to 2.5× the amounts required for the planned experiments.  
724 After following the SOP from DNA isolation to purification of the amplified products, all the purified samples  
725 from all the laboratories (n=160) were collected and sequenced using Illumina MiSeq paired-end 300 technology  
726 (at BaseClear, Leiden, NL). The Index PCR and Illumina library preparation was performed according to the



727 guideline and all 160 samples were sequenced on two Illumina flow cells. After Illumina MiSeq run, the raw  
1 NGS data was processed using the default settings of the CITESspeciesDetect pipeline. BLAST outputs for the  
2  
3 samples were distributed back to the participating laboratories for interpretation of results. The laboratories  
4  
5 interpreted the BLAST output based on the guideline provided in the SOP.  
6  
7

8 731

#### 9 732 **Availability of supporting data**

10 733 All the sequence data obtained from the pilot study and the international interlaboratory validation trial, the  
11  
12 CITESspeciesDetect pipeline and access to web interface are freely available. The generated barcode sequence  
13  
14 information for some animal and plant species were deposited in GenBank under the accession numbers  
15  
16 LT009695 to LT009705, and LT718651 (Additional file 1; Table S1). The Illumina PE300 MiSeq data obtained  
17  
18 from the pilot study and the international interlaboratory validation trial (n=177) were deposited to ENA with  
19  
20 study ID PRJEB18620. The script for the CITESspeciesDetect pipeline is available at GitHub. The web interface  
21  
22 for CITESspeciesDetect pipeline can be accessed via the following link: [http://decathlon-fp7.citespipe-wur.surf-](http://decathlon-fp7.citespipe-wur.surf-hosted.nl:8080/)  
23  
24 [hosted.nl:8080/](http://decathlon-fp7.citespipe-wur.surf-hosted.nl:8080/). The access to analysis via the web interface will be provided on request.  
25  
26

27 741

#### 28 742 **Availability and requirements**

29  
30  
31 743 Project name: CITESspeciesDetect

32  
33 744 Project home page: <https://github.com/RIKILT/CITESspeciesDetect>

34  
35 745 Operating system(s): Linux

36  
37 746 Programming language: Python and Bash

38  
39 747 Other requirements: none

40  
41 748 License: BSD 3-Clause License

42  
43 749 Any restrictions to use by non-academics: none  
44  
45  
46

47 750

48 751

49 752

50 753

51 754

52 755

53 756

54 757

55

56

57

58

59

60

61

758 **Additional files**

1  
2 759 **Additional file 1: Table S1** Accession numbers of DNA barcode sequences of plant and animal species. **Table**  
3  
4 760 **S2** PCR success rate for animal reference species. **Table S3** PCR success rate for plant reference species. **Table**  
5  
6 761 **S4** Statistics of different quality filtering settings for four DNA barcodes. **Table S5** BLAST identification of  
7  
8 762 species with different quality filtering settings for four DNA barcodes. **Table S6** Results of species-specific  
9  
10 763 qPCR performed on the experimental mixtures prepared for the inter-laboratory validation trial. **Table S7**  
11  
12 764 Interlaboratory trial study: average number of Illumina reads per sample, the average number of (pseudo)reads  
13  
14 765 that passed quality control (QC) and the percentage of QC (pseudo)reads that were assigned to DNA barcodes  
15  
16 766 and Operational Taxonomic Units (OTUs). **Table S8** qPCR primer and probe information. **Table S9** qPCR  
17  
18 767 reagent composition. **Table S10** qPCR thermocycling program. (\*.docx).

19  
20 768  
21  
22 769 **Additional file 2: Table S1** Pilot study: Composition of the experimental mixtures, and taxa identified using the  
23  
24 770 default settings of the CITESpeciesDetect pipeline. **Table S2** Interlaboratory trial: the taxonomic resolution  
25  
26 771 provided by each DNA barcode marker for eight experimental mixtures (\*.xlsx).

27  
28 772  
29 773 **Additional file 3:** Standard operating procedure (SOP) for the multi-locus DNA metabarcoding method that was  
30  
31 774 used in the inter-laboratory validation study (\*.pdf).

32  
33 775  
34  
35 776 **Additional file 4: Table S1** ENA accession numbers of all raw NGS datasets obtained in this study (\*.xlsx).

36 777  
37  
38 778 **Abbreviations**  
39  
40 779 CITES: Convention on International trade in Endangered Species of Wild fauna and flora; TMs: Traditional  
41  
42 780 Medicines; NGS: Next generation sequencing; CTAB: cetyltrimethylammonium bromide; COI: Cytochrome c  
43  
44 781 oxidase subunit I; *cyt b*: Cytochrome *b* gene; 16S rDNA: 16S ribosomal DNA; *matK*: Maturase K gene; *rbcL*:  
45  
46 782 ribulose-1,5-bisphosphate carboxylase large subunit gene; ITS2: Internal transcribed spacer region 2;; SOP:  
47  
48 783 Standard operating procedure; OTU: Operational Taxonomic Unit; BLAST: Basic Local Alignment Search Tool.

49  
50 784  
51  
52 785 **Competing interests**  
53  
54 786 The authors declare that they have no competing interest.

55  
56 787  
57 788  
58  
59 789  
60 790

791

1 792 **Funding**

2  
3 793 The DECATHLON project has been funded with support from the European Commission in the context of the  
4  
5 794 Seventh Framework Programme (FP7). This publication and all its contents reflect the views only of the authors,  
6  
7 795 and the Commission cannot be held responsible for any use, which may be made of the information contained  
8  
9 796 therein.

10  
11 797  
12 798 **Authors' Contributions**

13  
14 799 AJA and MS shared the first authorship. AJA, MS, MV, TP, AC, EK conceived and designed the experiments  
15  
16 800 for the pilot study. AJA performed the experiments for the pilot study. MS, RH, AJA developed the  
17  
18 801 CITESspeciesDetect pipeline. AJA, MS, RH analysed the NGS data obtained from the pilot study. AJA, MS,  
19  
20 802 MV, TP, TWP, IS, EK, FG, MTBC, AHJ involved in establishing the Standard Operation Procedure for the  
21  
22 803 validation trial. AJA, MS, MV, TP, EK conceived and designed the experiments for the validation trial. FG,  
23  
24 804 MTBC, AHJ, AJA, MS involved in coordinating the trial. AJA, MV prepared the samples and materials for the  
25  
26 805 validation trial and distributed to the participated laboratories. FR, MS, RH involved in developing the web-  
27  
28 806 interface. MS, TP, DD, MBI, MBU, HH, RHO, AK, LL, CN, HN, EP, JPR, RS, TS, CVM took part in the  
29  
30 807 validation trial. AJA, MS, RH, MV analysed the NGS data obtained from the validation trial. AJA, MS, RH, MV,  
31  
32 808 SVR, EK contributed to the writing of the manuscript. All authors read and approved the final manuscript.

33  
34 809  
35 810 **Acknowledgements**

36  
37  
38 811 This work was supported by the DECATHLON project, which was funded by the European Commission under  
39  
40 812 Seventh Framework Programme (FP7).

41  
42 813  
43 814

44 815 **Reference:**

- 45 816  
46 817 1. Chang C-H, Jang-Liaw N-H, Lin Y-S, Fang Y-C, Shao K-T: **Authenticating the use of dried**  
47 818 **seahorses in the traditional Chinese medicine market in Taiwan using molecular forensics.**  
48 819 *Journal of Food and Drug Analysis* 2013, **21**:310-316.  
49 820 2. Lee SY, Ng WL, Mahat MN, Nazre M, Mohamed R: **DNA Barcoding of the Endangered Aquilaria**  
50 821 **(Thymelaeaceae) and Its Application in Species Authentication of Agarwood Products Traded in**  
51 822 **the Market.** *PLOS One* 2016, **11**:e0154631.  
52 823 3. Milner-Gulland E, Bukreeva O, Coulson T, Lushchekina A, Kholodova M, Bekenov A, Grachev IA:  
53 824 **Conservation: Reproductive collapse in saiga antelope harems.** *Nature* 2003, **422**:135-135.  
54 825 4. Cheng X, Su X, Chen X, Zhao H, Bo C, Xu J, Bai H, Ning K: **Biological ingredient analysis of**  
55 826 **traditional Chinese medicine preparation based on high-throughput sequencing: the story for**  
56 827 **Liuwei Dihuang Wan.** *Scientific Reports* 2014, **4**: 5147.  
57 828 5. Coghlan ML, Haile J, Houston J, Murray DC, White NE, Moolhuijzen P, Bellgard MI, Bunce M: **Deep**  
58 829 **sequencing of plant and animal DNA contained within traditional Chinese medicines reveals**  
59 830 **legality issues and health safety concerns.** *PLOS Genetics* 2012, **8**:e1002657.

- 831 6. Coghlan ML, Maker G, Crighton E, Haile J, Murray DC, White NE, Byard RW, Bellgard MI, Mullaney  
1 832 I, Trengove R: **Combined DNA, toxicological and heavy metal analyses provides an auditing**  
2 833 **toolkit to improve pharmacovigilance of traditional Chinese medicine (TCM).** *Scientific Reports*  
3 834 2015, **5**.
- 4 835 7. Ivanova NV, Kuzmina ML, Braukmann TWA, Borisenko AV, Zakharov EV: **Authentication of**  
5 836 **Herbal Supplements Using Next-Generation Sequencing.** *PLOS One* 2016, **11**:e0156426.
- 6 837 8. Taberlet P, Coissac E, Pompanon F, Brochmann C, Willerslev E: **Towards next-generation**  
7 838 **biodiversity assessment using DNA metabarcoding.** *Molecular Ecology* 2012, **21**:2045-2050.
- 8 839 9. Staats M, Arulandhu AJ, Gravendeel B, Holst-Jensen A, Scholtens I, Peelen T, Prins TW, Kok E:  
9 840 **Advances in DNA metabarcoding for food and wildlife forensic species identification.** *Analytical*  
10 841 *and Bioanalytical Chemistry* 2016:1-16.
- 11 842 10. Fahner NA, Shokralla S, Baird DJ, Hajibabaei M: **Large-scale monitoring of plants through**  
12 843 **environmental DNA metabarcoding of soil: recovery, resolution, and annotation of four DNA**  
13 844 **markers.** *PLOS One* 2016, **11**:e0157505.
- 14 845 11. Arulandhu AJ, Staats M, Peelen T, Kok E: **DNA metabarcoding of endangered plant and animal**  
15 846 **species in seized forensic samples.** In *Genome*. 2015: 188-189.
- 16 847 12. Taylor H, Harris W: **An emergent science on the brink of irrelevance: a review of the past 8 years**  
17 848 **of DNA barcoding.** *Molecular Ecology Resources* 2012, **12**:377-388.
- 18 849 13. Little DP: **A DNA mini-barcode for land plants.** *Molecular Ecology Resources* 2014, **14**:437-446.
- 19 850 14. Parveen I, Gafner S, Techen N, Murch SJ, Khan IA: **DNA Barcoding for the Identification of**  
20 851 **Botanicals in Herbal Medicine and Dietary Supplements: Strengths and Limitations.** *Planta*  
21 852 *Medica* 2016, **82**:1225-1235.
- 22 853 15. Chen R, Dong J, Cui X, Wang W, Yasmeen A, Deng Y, Zeng X, Tang Z: **DNA based identification of**  
23 854 **medicinal materials in Chinese patent medicines.** *Scientific Reports* 2012, **2**:958.
- 24 855 16. Scholtens I, Laurensse E, Molenaar B, Zaaier S, Gaballo H, Boleij P, Bak A, Kok E: **Practical**  
25 856 **experiences with an extended screening strategy for genetically modified organisms (GMOs) in**  
26 857 **real-life samples.** *Journal of agricultural and food chemistry* 2013, **61**:9097-9109.
- 27 858 17. Murray M, Thompson WF: **Rapid isolation of high molecular weight plant DNA.** *Nucleic Acids*  
28 859 *Research* 1980, **8**:4321-4326.
- 29 860 18. Ivanova NV, Zemlak TS, Hanner RH, Hebert PDN: **Universal primer cocktails for fish DNA**  
30 861 **barcoding.** *Molecular Ecology Notes* 2007, **7**:544-548.
- 31 862 19. Edgar RC: **Search and clustering orders of magnitude faster than BLAST.** *Bioinformatics* 2010,  
32 863 **26**:2460-2461.
- 33 864 20. Altschul SF, Madden TL, Schäffer AA, Zhang J, Zhang Z, Miller W, Lipman DJ: **Gapped BLAST and**  
34 865 **PSI-BLAST: a new generation of protein database search programs.** *Nucleic Acids Research* 1997,  
35 866 **25**:3389-3402.
- 36 867 21. Hebert PD, Cywinska A, Ball SL, deWaard JR: **Biological identifications through DNA barcodes.**  
37 868 *Proceedings of the Royal Society of London B: Biological Sciences* 2003, **270**:313-321.
- 38 869 22. Group CPW, Hollingsworth PM, Forrest LL, Spouge JL, Hajibabaei M, Ratnasingham S, van der Bank  
39 870 M, Chase MW, Cowan RS, Erickson DL: **A DNA barcode for land plants.** *Proceedings of the*  
40 871 *National Academy of Sciences* 2009, **106**:12794-12797.
- 41 872 23. Gryson N: **Effect of food processing on plant DNA degradation and PCR-based GMO analysis: a**  
42 873 **review.** *Analytical and Bioanalytical Chemistry* 2010, **396**:2003-2022.
- 43 874 24. Galimberti A, De Mattia F, Losa A, Bruni I, Federici S, Casiraghi M, Martellos S, Labra M: **DNA**  
44 875 **barcoding as a new tool for food traceability.** *Food Research International* 2013, **50**:55-63.
- 45 876 25. Taberlet P, Coissac E, Hajibabaei M, Rieseberg LH: **Environmental DNA.** *Molecular Ecology* 2012,  
46 877 **21**:1789-1793.
- 47 878 26. Iyengar A: **Forensic DNA analysis for animal protection and biodiversity conservation: a review.**  
48 879 *Journal for Nature Conservation* 2014, **22**:195-205.
- 49 880 27. Martin M: **Cutadapt removes adapter sequences from high-throughput sequencing reads.** *EMBnet*  
50 881 *journal* 2011, **17**:10-12.
- 51 882 28. Schmieder R, Edwards R: **Quality control and preprocessing of metagenomic datasets.**  
52 883 *Bioinformatics* 2011, **27**:863-864.
- 53 884 29. Palumbi S, Martin A, Romano S, McMillan W, Stice L, Grabowski G: **The Simple Fool's Guide to**  
54 885 **PCR, Version 2.0, privately published document compiled by S. Palumbi.** Dept. Zoology, Univ  
55 886 *Hawaii, Honolulu, HI* 1991, **96822**.
- 56 887 30. Sarri C, Stamatis C, Sarafidou T, Galara I, Godosopoulos V, Kolovos M, Liakou C, Tastsoglou S,  
57 888 Mamuris Z: **A new set of 16S rRNA universal primers for identification of animal species.** *Food*  
58 889 *Control* 2014, **43**:35-41.

- 890 31. Leray M, Yang JY, Meyer CP, Mills SC, Agudelo N, Ranwez V, Boehm JT, Machida RJ: **A new**  
1 891 **versatile primer set targeting a short fragment of the mitochondrial COI region for**  
2 892 **metabarcoding metazoan diversity: application for characterizing coral reef fish gut contents.**  
3 893 *Front Zool* 2013, **10**:34.
- 4 894 32. Geller J, Meyer C, Parker M, Hawk H: **Redesign of PCR primers for mitochondrial cytochrome c**  
5 895 **oxidase subunit I for marine invertebrates and application in all-taxa biotic surveys.** *Molecular*  
6 896 *Ecology Resources* 2013, **13**:851-861.
- 7 897 33. Parson W, Pegoraro K, Niederstätter H, Föger M, Steinlechner M: **Species identification by means of**  
8 898 **the cytochrome b gene.** *International Journal of Legal Medicine* 2000, **114**:23-28.
- 9 899 34. Fazekas AJ, Kuzmina ML, Newmaster SG, Hollingsworth PM: **DNA barcoding methods for land**  
10 900 **plants.** *Methods in Molecular Biology* 2012, **858**:223-252.
- 11 901 35. Cuénoud P, Savolainen V, Chatrou LW, Powell M, Grayer RJ, Chase MW: **Molecular phylogenetics**  
12 902 **of Caryophyllales based on nuclear 18S rDNA and plastid *rbcL*, *atpB*, and *matK* DNA sequences.**  
13 903 *American Journal of Botany* 2002, **89**:132-144.
- 14 904 36. Levin RA, Wagner WL, Hoch PC, Nepokroeff M, Pires JC, Zimmer EA, Sytsma KJ: **Family-level**  
15 905 **relationships of Onagraceae based on chloroplast *rbcL* and *ndhF* data.** *American Journal of Botany*  
16 906 2003, **90**:107-115.
- 17 907 37. Kress WJ, Erickson DL: **A two-locus global DNA barcode for land plants: the coding *rbcL* gene**  
18 908 **complements the non-coding *trnH-psbA* spacer region.** *PLOS One* 2007, **2**:e508.
- 19 909 38. Fazekas AJ, Burgess KS, Kesanakurti PR, Graham SW, Newmaster SG, Husband BC, Percy DM,  
20 910 Hajibabaei M, Barrett SC: **Multiple multilocus DNA barcodes from the plastid genome**  
21 911 **discriminate plant species equally well.** *PLOS One* 2008, **3**:e2802.
- 22 912 39. Taberlet P, Coissac E, Pompanon F, Gielly L, Miquel C, Valentini A, Vermet T, Corthier G,  
23 913 Brochmann C, Willerslev E: **Power and limitations of the chloroplast *trnL* (UAA) intron for plant**  
24 914 **DNA barcoding.** *Nucleic Acids Research* 2007, **35**:e14.
- 25 915 40. Chen S, Yao H, Han J, Liu C, Song J, Shi L, Zhu Y, Ma X, Gao T, Pang X: **Validation of the ITS2**  
26 916 **region as a novel DNA barcode for identifying medicinal plant species.** *PLOS One* 2010, **5**:e8613.
- 27 917 41. Sang T, Crawford D, Stuessy T: **Chloroplast DNA phylogeny, reticulate evolution, and**  
28 918 **biogeography of *Paeonia* (Paeoniaceae).** *American Journal of Botany* 1997, **84**:1120-1136.
- 29 919 42. Tate JA, Simpson BB: **Paraphyly of *Tarasa* (Malvaceae) and diverse origins of the polyploid**  
30 920 **species.** *Systematic Botany* 2003, **28**:723-737.
- 31 921 43. Manning J, Boatwright JS, Daru BH, Maurin O, Bank Mvd: **A molecular phylogeny and generic**  
32 922 **classification of Asphodelaceae subfamily Alooideae: a final resolution of the prickly issue of**  
33 923 **polyphyly in the alooids?** *Systematic Botany* 2014, **39**:55-74.  
34 924  
35  
36  
37  
38  
39  
40  
41  
42  
43  
44  
45  
46  
47  
48  
49  
50  
51  
52  
53  
54  
55  
56  
57  
58  
59  
60  
61  
62  
63  
64  
65

## Figure file:

### **Development and validation trial of a multi-locus DNA metabarcoding method to identify endangered species in complex samples.**

Alfred J. Arulandhu, Martijn Staats, Rico Hagelaar, Marleen M. Voorhuijzen, Theo W. Prins, Ingrid Scholtens, Adalberto Costessi, Danny Duijsings, François Rechenmann, Frédéric B. Gaspar, Maria Teresa Barreto Crespo, Arne Holst-Jensen, Matthew Birck, Malcolm Burns, Hez Hird, Rupert Hochegger, Alexander Klingl, Lisa Lundberg, Chiara Natale , Hauke Niekamp, Elena Perri, Alessandra Barbante , Jean-Philippe Rosec, Ralf Seyfarth, Tereza Sovová, Christoff Van Moorlegem, Saskia van Ruth, Tamara Peelen and Esther Kok

Figure 1: Schematic representation of the CITESpeciesDetect pipeline.

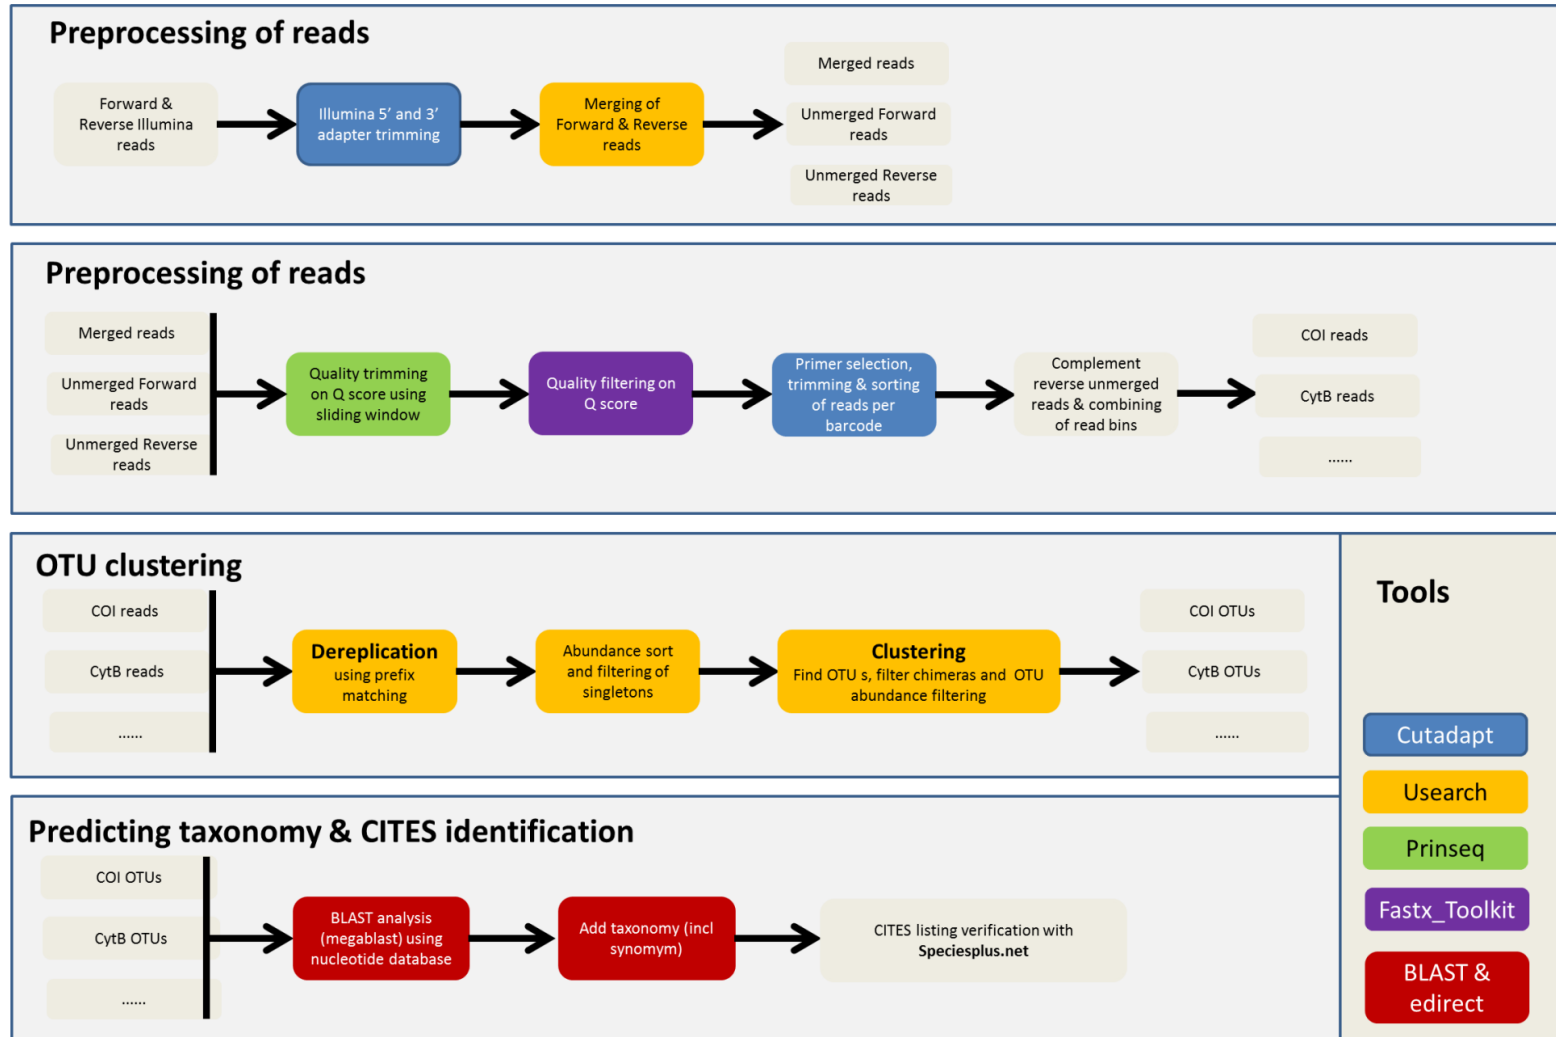

Figure 2: The percentage of QC reads assigned to DNA barcodes for samples EM10, EM10R, EM11 and EM11R of the pilot study.

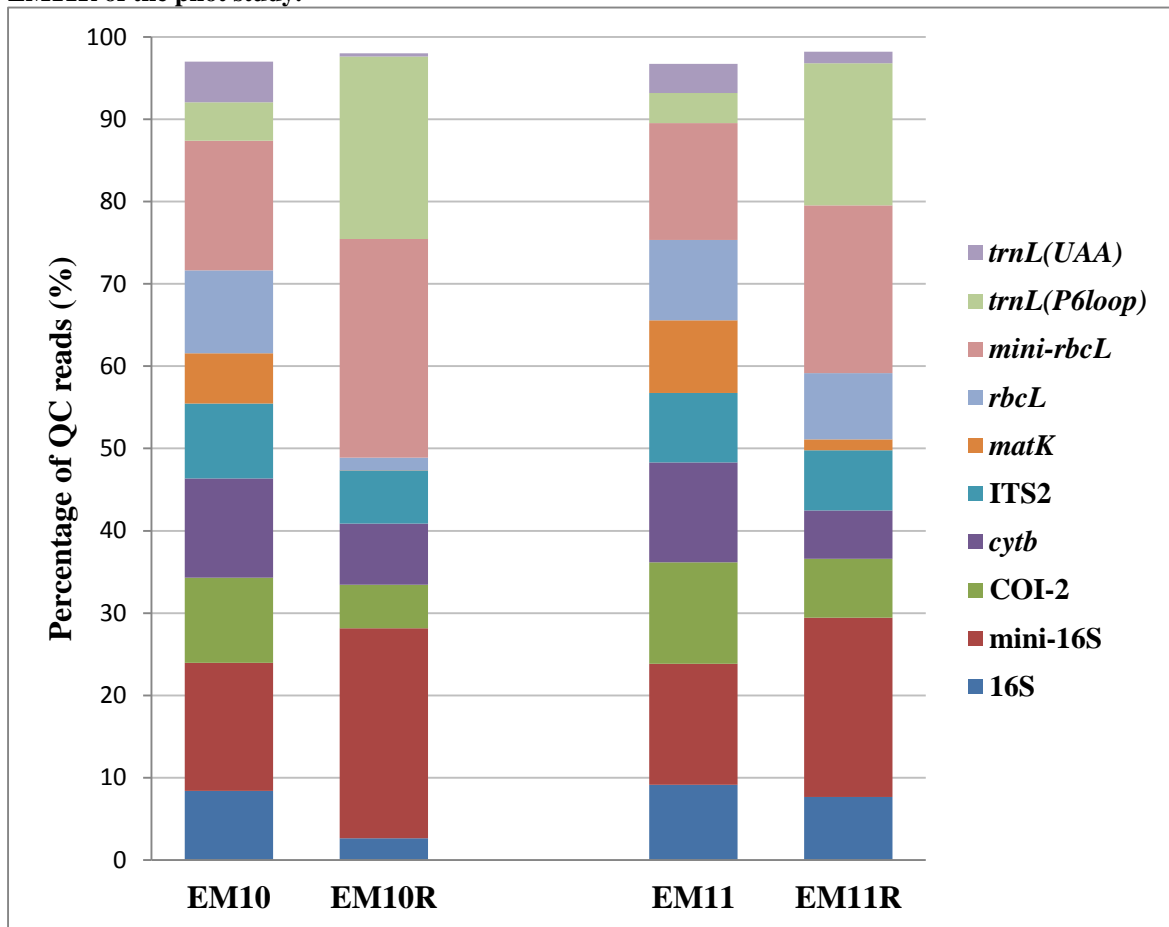





Click here to access/download

**Supplementary Material**

A multi-locus DNA metabarcoding  
method\_Tables\_AJ\_Arulandhu .docx



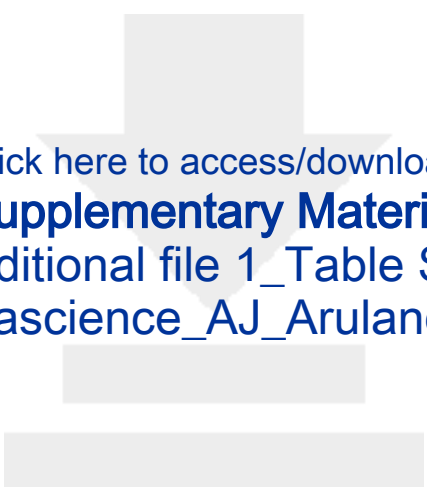

Click here to access/download  
**Supplementary Material**  
Additional file 1\_Table S1-  
S10\_Gigascience\_AJ\_Arulandhu.docx

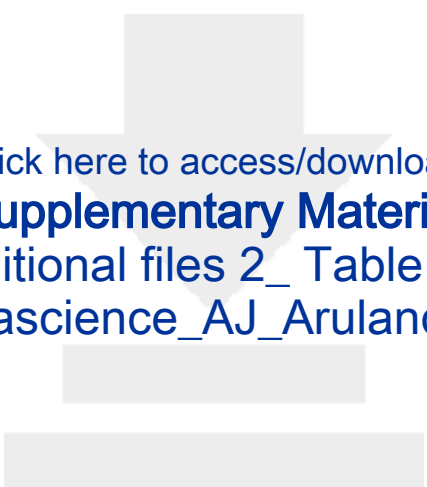

Click here to access/download  
**Supplementary Material**  
Additional files 2\_ Table S1-  
S2\_Gigascience\_AJ\_Arulandhu.xlsx

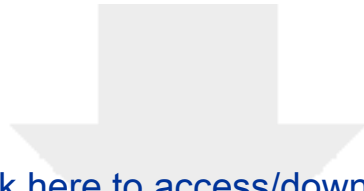

[Click here to access/download](#)

**Supplementary Material**

[Additional file 3\\_SOP\\_Gigascience\\_AJ\\_Arulandhu.pdf](#)

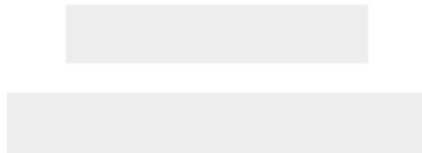

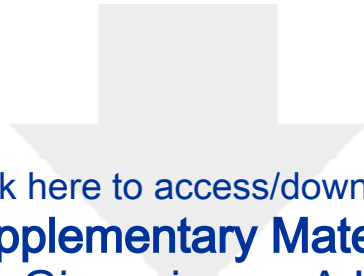

[Click here to access/download](#)

**Supplementary Material**

[Additional file 4\\_Gigascience\\_AJ\\_Arulandhu.xlsx](#)



Dear editor,

The tables for the manuscript was uploaded under the supplementary file with the title: A multi-locus DNA metabarcoding method\_Tables\_AJ\_Arulandhu.docx. Please include this file while reviewing the manuscript.

Warm regards,  
Alfred J Arulandhu
